# Supplementary material for: Effectiveness of interventions designed to mitigate the negative health outcomes of informal caregiving to older adults: an umbrella review of systematic reviews and meta-analyses
Source: BMJ Open. 2023 Apr 21;13(4):e068646. doi: 10.1136/bmjopen-2022-068646 (PMC10124259; doi:10.1136/bmjopen-2022-068646)
Supplement: Supplementary data [file bmjopen-2022-068646supp001.pdf]

## Supplementary materials

These supplementary materials are provided by the authors to give readers additional information about the study “Effectiveness of interventions designed to mitigate the negative health outcomes of informal caregiving to older adults: an umbrella review of systematic reviews and meta-analyses”.

## Table of Contents

|                                                                                                                        |    |
|------------------------------------------------------------------------------------------------------------------------|----|
| Supplementary Table 1. Amendments made to the published protocol.....                                                  | 3  |
| Supplementary Table 2. Search strategies .....                                                                         | 4  |
| Supplementary Table 3. Exclusion decisions based on high overlap among quantitative reviews .....                      | 8  |
| Supplementary Table 4. Application of Hendricks et al.'s mega-aggregation framework synthesis method .....             | 11 |
| Supplementary Table 5a. AMSTAR-2 quality assessment tool for quantitative reviews.....                                 | 12 |
| Supplementary Table 5b. <i>Ad hoc</i> quality assessment tool for qualitative reviews .....                            | 13 |
| Supplementary Table 6. Repository of all included reviews ( <i>n</i> =47) .....                                        | 14 |
| Supplementary Table 7. Summary of findings for interventions involving case management .....                           | 25 |
| Supplementary Table 8. Summary of findings for psychosocial, psychoeducational, and skills-building interventions..... | 26 |
| Supplementary Table 9. Summary of findings for interventions involving respite care .....                              | 29 |
| Supplementary Table 10. Summary of findings for interventions involving relaxation, physical activity, or leisure..... | 30 |
| Supplementary Table 11. Summary of findings for interventions involving mindfulness-based activities.....              | 31 |
| Supplementary Table 12. Coding table for qualitative data.....                                                         | 32 |

### Additional supplementary materials not included within this document:

- Supplementary File 1: Excel spreadsheet for GROOVE citation assessment tool: quantitative reviews
- Supplementary File 2: Excel spreadsheet for GROOVE citation assessment tool: qualitative reviews

**Supplementary Table 1. Amendments made to the published protocol** ([doi:10.1136/bmjopen-2021-053117](https://doi.org/10.1136/bmjopen-2021-053117))

| Amendment                                                                                                                                                                                                                                                                                                                                                                                                                                                                                                                                                                                                                                                                                                                                                                                                                                                                                                                                                                                                                                                                                                                                                                                                                                                                                                                                                                                                                                                                                                                                                                                                                                                                                                                                                                                                                                                                                        | Rationale                                                                                                                                                                                                                                                                                                                                                                                                                                                                                                                                                        |
|--------------------------------------------------------------------------------------------------------------------------------------------------------------------------------------------------------------------------------------------------------------------------------------------------------------------------------------------------------------------------------------------------------------------------------------------------------------------------------------------------------------------------------------------------------------------------------------------------------------------------------------------------------------------------------------------------------------------------------------------------------------------------------------------------------------------------------------------------------------------------------------------------------------------------------------------------------------------------------------------------------------------------------------------------------------------------------------------------------------------------------------------------------------------------------------------------------------------------------------------------------------------------------------------------------------------------------------------------------------------------------------------------------------------------------------------------------------------------------------------------------------------------------------------------------------------------------------------------------------------------------------------------------------------------------------------------------------------------------------------------------------------------------------------------------------------------------------------------------------------------------------------------|------------------------------------------------------------------------------------------------------------------------------------------------------------------------------------------------------------------------------------------------------------------------------------------------------------------------------------------------------------------------------------------------------------------------------------------------------------------------------------------------------------------------------------------------------------------|
| <b>Research question 4</b><br><i>Protocol:</i> (4) How are the proposed interventions experienced by caregivers in terms of their acceptability, feasibility and added value?<br><i>Amended:</i> (4) How are the proposed interventions experienced by caregivers in terms of effectiveness and implementation outcomes?                                                                                                                                                                                                                                                                                                                                                                                                                                                                                                                                                                                                                                                                                                                                                                                                                                                                                                                                                                                                                                                                                                                                                                                                                                                                                                                                                                                                                                                                                                                                                                         | We amended the fourth research question based on a data-driven approach to encompass a wider range of implementation outcomes. During the qualitative data extraction and categorization exercise, it became clear that data was richer than originally anticipated. We believe that the current formulation better addresses the complexity of intervention experiences, as reported by caregivers.                                                                                                                                                             |
| <b>Timeframe</b><br><i>Protocol:</i> the review is anticipated to be conducted in the period of 1 April 2021– 31 May 2022.                                                                                                                                                                                                                                                                                                                                                                                                                                                                                                                                                                                                                                                                                                                                                                                                                                                                                                                                                                                                                                                                                                                                                                                                                                                                                                                                                                                                                                                                                                                                                                                                                                                                                                                                                                       | Due to the volume of work required to finalize the umbrella review, we did not fit in the anticipated timeframe. Instead, the final draft of the report was completed in late June of 2022.                                                                                                                                                                                                                                                                                                                                                                      |
| <b>Exclusion criteria</b><br><i>Amended:</i> we excluded reviews of critically low quality, as assessed by AMSTAR-2 or the <i>ad hoc</i> qualitative tool.<br><i>Amended:</i> we excluded reviews from review pairs with high overlap, as assessed by the Corrected Covered Area methodology.                                                                                                                                                                                                                                                                                                                                                                                                                                                                                                                                                                                                                                                                                                                                                                                                                                                                                                                                                                                                                                                                                                                                                                                                                                                                                                                                                                                                                                                                                                                                                                                                    | We introduced two additional exclusion criteria related to the quality of reviews and overlap between reviews. Due to an abundance of reviews of, on average, low quality based on AMSTAR-2, we decided to exclude reviews of critically low quality, thus increasing the certainty of the evidence we subsequently synthesized. Overlap exclusion decisions were made in a data-driven approach, based on the assessment of primary study overlap. We excluded overlapping reviews to avoid double counting and overrepresentation of certain types of studies. |
| <b>Data sources and search strategy</b><br><i>Protocol:</i> we will use CoCites citation-based search tool to widen the net and retrieve articles that cite eligible systematic reviews. [...] Additional searches will be developed for syntheses of effectiveness, implementation or process evaluations published or mandated by official health agencies. We will contact the first and last authors of selected reviews to retrieve grey literature that may otherwise have been missed.<br><i>Amended:</i> we performed a manual search of reference lists of included reviews. The rest of the steps were not undertaken.                                                                                                                                                                                                                                                                                                                                                                                                                                                                                                                                                                                                                                                                                                                                                                                                                                                                                                                                                                                                                                                                                                                                                                                                                                                                 | Our search strategies led to an overwhelming number of reviews on the topic. Due to an abundance and overrepresentation of available evidence, we decided to be pragmatic and not use any citation search tool. We did not contact experts of official health agencies since the volume of peer-reviewed evidence was already sufficient.                                                                                                                                                                                                                        |
| <b>Change in AMSTAR-2 assessment</b><br>Item 10 ( <i>Did the review authors report on the sources of funding for the studies included in the review?</i> ) was not considered as critical.                                                                                                                                                                                                                                                                                                                                                                                                                                                                                                                                                                                                                                                                                                                                                                                                                                                                                                                                                                                                                                                                                                                                                                                                                                                                                                                                                                                                                                                                                                                                                                                                                                                                                                       | The team made a consensus-based decision not to include item 10 of AMSTAR-2 as a critical item since this information was exclusively provided by Cochrane reviews. Considering this item as critical would have significantly limited the inclusion of reviews in our umbrella review. In addition, the team considered this criterion too stringent since this is not common practice in non-Cochrane, non-clinical reviews, especially in the field of public health intervention research.                                                                   |
| <b>Change in <i>ad hoc</i> quality assessment tool for qualitative reviews</b>                                                                                                                                                                                                                                                                                                                                                                                                                                                                                                                                                                                                                                                                                                                                                                                                                                                                                                                                                                                                                                                                                                                                                                                                                                                                                                                                                                                                                                                                                                                                                                                                                                                                                                                                                                                                                   | The team decided to exclude critically low-quality reviews from the qualitative batch as well. Therefore, based on internal consensus, items 3,4,7,10 of the <i>ad hoc</i> quality assessment tool were designated as critical, and reviews with more than two critical flaws were excluded.                                                                                                                                                                                                                                                                     |
| <b>Qualitative synthesis methods</b><br><i>Protocol:</i> Evidence from syntheses of qualitative research will also be presented in tabular format. Results will be synthesized and illustrated by using verbatim replications from the source review where appropriate. Findings will also be described and interpreted in the research team's own words. Caregivers' experiences and views on barriers to and facilitators of interventions will be identified in terms of acceptability, feasibility and added value (research question 4). The diversity of caregivers, care receivers and/or care contexts will be considered as far as possible.<br><i>Amended:</i> For qualitative reviews, we followed the 'mega-aggregation framework' synthesis method, which has been described elsewhere. First, the extracted verbatim texts from reviews were coded line-by-line (complete coding) by two team members. Codes were then iteratively and deductively categorized based on the adapted version of van Houtven et al.'s framework. Throughout the review, we refer to verbatim texts extracted from reviews and their corresponding codes as third-order constructs, while primary studies inform second-order constructs, and the communication from participants (i.e., caregivers) is considered as first-order construct. Thus, the themes, categories, and sub-categories that we generated based on third-order constructs (i.e., reviews) are termed as fourth-order constructs. In case our fourth-order codes did not fit fully into the framework, they were inductively categorized into new themes. Codes referring to care receivers or staff opinions were removed. A third investigator checked the outcome of the categorization independently, and several consensus meetings were held to resolve disagreements and finalize the synthesis of qualitative materials. | In addition to amending research question 4, methods for synthesizing qualitative data were further developed. Instead of simply providing a narrative summary with verbatim quotes, we undertook a mega-aggregation approach, complemented by "best-fit" framework synthesis. We believe that these methods are better suited for synthesizing review-level qualitative data.                                                                                                                                                                                   |

**Supplementary Table 2. Search strategies****Databases:**

1. Medline (via Ovid)
2. Web of Science Core Collection (via Clarivate)
3. PsycInfo (via Ovid)
4. Cinahl (via EBSCO)

**Total number of hits:** before deduplication n=11,605 / after deduplication n=6213

**1. Search strategy and results in Medline**

Interface: Ovid MEDLINE(R) and Epub Ahead of Print, In-Process & Other Non-Indexed Citations and Daily Field labels

Date of Search: 26 March 2021

Number of hits: 3,158

- exp/ = exploded MeSH term
- / = non exploded MeSH term
- .ti,ab,kf. = title, abstract and author keywords
- adjx = within x words, regardless of order
- \* = truncation of word for alternate endings

Database(s): **Ovid MEDLINE(R) and Epub Ahead of Print, In-Process, In-Data-Review & Other Non-Indexed Citations and Daily** 1946 to March 26, 2021

| #  | Searches                                                                                                                                                                                                                                                                                                                                   | Results  |
|----|--------------------------------------------------------------------------------------------------------------------------------------------------------------------------------------------------------------------------------------------------------------------------------------------------------------------------------------------|----------|
| 1  | exp Aged/                                                                                                                                                                                                                                                                                                                                  | 3219373  |
| 2  | exp Aging/                                                                                                                                                                                                                                                                                                                                 | 250613   |
| 3  | Frailty/                                                                                                                                                                                                                                                                                                                                   | 3780     |
| 4  | (advanced age or aged or ageing or aging or elder* or frail* or geriatr* or gerontolog* or late* life or old age or old* adult* or old* client* or old* individual* or old* man or old* men or old* patient* or old* people or old* person* or old* population* or old* woman or old* women or oldest old or retired or senior*).ti,ab,kf. | 1504150  |
| 5  | Dementia/                                                                                                                                                                                                                                                                                                                                  | 53069    |
| 6  | Alzheimer Disease/                                                                                                                                                                                                                                                                                                                         | 97714    |
| 7  | (dementia* or alzheimer*).ti,ab,kf.                                                                                                                                                                                                                                                                                                        | 230766   |
| 8  | exp Neoplasms/                                                                                                                                                                                                                                                                                                                             | 3433491  |
| 9  | (neoplasm* or cancer*).ti,ab,kf.                                                                                                                                                                                                                                                                                                           | 2107334  |
| 10 | exp Stroke/                                                                                                                                                                                                                                                                                                                                | 141822   |
| 11 | stroke.ti,ab,kf.                                                                                                                                                                                                                                                                                                                           | 258717   |
| 12 | Parkinson disease/                                                                                                                                                                                                                                                                                                                         | 68962    |
| 13 | parkinson*.ti,ab,kf.                                                                                                                                                                                                                                                                                                                       | 124358   |
| 14 | Multimorbidity/                                                                                                                                                                                                                                                                                                                            | 1267     |
| 15 | multimorbid*.ti,ab,kf.                                                                                                                                                                                                                                                                                                                     | 5841     |
| 16 | exp Heart failure/                                                                                                                                                                                                                                                                                                                         | 126175   |
| 17 | (heart failure or cardiac failure).ti,ab,kf.                                                                                                                                                                                                                                                                                               | 193402   |
| 18 | or/1-17                                                                                                                                                                                                                                                                                                                                    | 7707943  |
| 19 | Caregivers/                                                                                                                                                                                                                                                                                                                                | 38935    |
| 20 | (caregiv* or care giv* or caretak* or care tak* or carer*).ti,ab,kf.                                                                                                                                                                                                                                                                       | 98680    |
| 21 | ((family or informal or unpaid) adj3 (care or caring)).ti,ab,kf.                                                                                                                                                                                                                                                                           | 17170    |
| 22 | or/19-21                                                                                                                                                                                                                                                                                                                                   | 118701   |
| 23 | (meta analysis or systematic review).pt.                                                                                                                                                                                                                                                                                                   | 214329   |
| 24 | review.ti.                                                                                                                                                                                                                                                                                                                                 | 524072   |
| 25 | systematic* review*.ab,kf.                                                                                                                                                                                                                                                                                                                 | 154180   |
| 26 | (meta analy* or metaanaly* or meta stud* or meta interpretation* or meta ethnograph* or meta summar* or meta synthes* or meta narrative* or mixed research synthes*).ti,ab,kf.                                                                                                                                                             | 200564   |
| 27 | ((concept analy* or grounded theory) and review*).ti,ab,kf.                                                                                                                                                                                                                                                                                | 1518     |
| 28 | or/23-27                                                                                                                                                                                                                                                                                                                                   | 699974   |
| 29 | 18 and 22 and 28                                                                                                                                                                                                                                                                                                                           | 3304     |
| 30 | (english or swedish or spanish or french or italian or german).lg.                                                                                                                                                                                                                                                                         | 29905965 |
| 31 | 29 and 30                                                                                                                                                                                                                                                                                                                                  | 3269     |
| 32 | limit 31 to yr="2000 -Current"                                                                                                                                                                                                                                                                                                             | 3178     |
| 33 | limit 32 to (comment or congress or editorial or letter)                                                                                                                                                                                                                                                                                   | 20       |
| 34 | 32 not 33                                                                                                                                                                                                                                                                                                                                  | 3158     |

## 2. Search strategy and results in Web of Science Core Collection

Interface: Clarivate Analytics Field labels

Date of Search: 26 March 2021

- TS/Topic = title, abstract, author keywords and Keywords Plus
- NEAR/x = within x words, regardless of order
- \* = truncation of word for alternate endings

Number of hits: 3,991

|      |           |                                                                                                                                                                                                                                                                                                                                                                                                                                                                                                                                                       |
|------|-----------|-------------------------------------------------------------------------------------------------------------------------------------------------------------------------------------------------------------------------------------------------------------------------------------------------------------------------------------------------------------------------------------------------------------------------------------------------------------------------------------------------------------------------------------------------------|
| # 15 | 3,991     | <b>#11 AND #6 AND #3</b><br><b>Refined by: [excluding] DOCUMENT TYPES: ( MEETING ABSTRACT OR BOOK REVIEW OR PROCEEDINGS PAPER OR EDITORIAL MATERIAL OR LETTER ) AND PUBLICATION YEARS: ( 2021 OR 2013 OR 2005 OR 2020 OR 2012 OR 2004 OR 2019 OR 2011 OR 2003 OR 2018 OR 2010 OR 2002 OR 2017 OR 2009 OR 2001 OR 2016 OR 2008 OR 2000 OR 2015 OR 2007 OR 2014 OR 2006 ) AND LANGUAGES: ( ENGLISH OR GERMAN OR SPANISH OR ITALIAN OR FRENCH OR SWEDISH)</b><br><i>Indexes=SCI-EXPANDED, SSCI, A&amp;HCI, CPCI-S, CPCI-SSH, ESCI Timespan=All years</i> |
| # 14 | 4,007     | <b>#11 AND #6 AND #3</b><br><b>Refined by: [excluding] DOCUMENT TYPES: ( MEETING ABSTRACT OR BOOK REVIEW OR PROCEEDINGS PAPER OR EDITORIAL MATERIAL OR LETTER ) AND PUBLICATION YEARS: ( 2021 OR 2013 OR 2005 OR 2020 OR 2012 OR 2004 OR 2019 OR 2011 OR 2003 OR 2018 OR 2010 OR 2002 OR 2017 OR 2009 OR 2001 OR 2016 OR 2008 OR 2000 OR 2015 OR 2007 OR 2014 OR 2006 )</b><br><i>Indexes=SCI-EXPANDED, SSCI, A&amp;HCI, CPCI-S, CPCI-SSH, ESCI Timespan=All years</i>                                                                                |
| # 13 | 4,075     | <b>#11 AND #6 AND #3</b><br><b>Refined by: [excluding] DOCUMENT TYPES: ( MEETING ABSTRACT OR BOOK REVIEW OR PROCEEDINGS PAPER OR EDITORIAL MATERIAL OR LETTER )</b><br><i>Indexes=SCI-EXPANDED, SSCI, A&amp;HCI, CPCI-S, CPCI-SSH, ESCI Timespan=All years</i>                                                                                                                                                                                                                                                                                        |
| # 12 | 4,262     | <b>#11 AND #6 AND #3</b><br><i>Indexes=SCI-EXPANDED, SSCI, A&amp;HCI, CPCI-S, CPCI-SSH, ESCI Timespan=All years</i>                                                                                                                                                                                                                                                                                                                                                                                                                                   |
| # 11 | 1,062,768 | <b>#10 OR #9 OR #8 OR #7</b><br><i>Indexes=SCI-EXPANDED, SSCI, A&amp;HCI, CPCI-S, CPCI-SSH, ESCI Timespan=All years</i>                                                                                                                                                                                                                                                                                                                                                                                                                               |
| # 10 | 2,084     | <b>TS= ("concept analy*" or "grounded theory") and review*)</b><br><i>Indexes=SCI-EXPANDED, SSCI, A&amp;HCI, CPCI-S, CPCI-SSH, ESCI Timespan=All years</i>                                                                                                                                                                                                                                                                                                                                                                                            |
| # 9  | 393,878   | <b>TS= ("meta analy*" or metaanaly* or "meta stud*" or "meta interpretation*" or "meta ethnograph*" or "meta summar*" or "meta syntheses*" or "meta narrative*" or "mixed research syntheses*")</b><br><i>Indexes=SCI-EXPANDED, SSCI, A&amp;HCI, CPCI-S, CPCI-SSH, ESCI Timespan=All years</i>                                                                                                                                                                                                                                                        |
| # 8  | 227,798   | <b>TS= "systematic* review*"</b><br><i>Indexes=SCI-EXPANDED, SSCI, A&amp;HCI, CPCI-S, CPCI-SSH, ESCI Timespan=All years</i>                                                                                                                                                                                                                                                                                                                                                                                                                           |
| # 7  | 732,777   | <b>TI=review</b><br><i>Indexes=SCI-EXPANDED, SSCI, A&amp;HCI, CPCI-S, CPCI-SSH, ESCI Timespan=All years</i>                                                                                                                                                                                                                                                                                                                                                                                                                                           |
| # 6  | 131,791   | <b>#5 OR #4</b><br><i>Indexes=SCI-EXPANDED, SSCI, A&amp;HCI, CPCI-S, CPCI-SSH, ESCI Timespan=All years</i>                                                                                                                                                                                                                                                                                                                                                                                                                                            |
| # 5  | 23,282    | <b>TS= ("family" or "informal" or "unpaid") NEAR/3 ("care" or "caring") )</b><br><i>Indexes=SCI-EXPANDED, SSCI, A&amp;HCI, CPCI-S, CPCI-SSH, ESCI Timespan=All years</i>                                                                                                                                                                                                                                                                                                                                                                              |
| # 4  | 115,945   | <b>TS= (caregiv* or "care giv*" or caretak* or "care tak*" or carer*)</b><br><i>Indexes=SCI-EXPANDED, SSCI, A&amp;HCI, CPCI-S, CPCI-SSH, ESCI Timespan=All years</i>                                                                                                                                                                                                                                                                                                                                                                                  |
| # 3  | 5,155,246 | <b>#2 OR #1</b><br><i>Indexes=SCI-EXPANDED, SSCI, A&amp;HCI, CPCI-S, CPCI-SSH, ESCI Timespan=All years</i>                                                                                                                                                                                                                                                                                                                                                                                                                                            |
| # 2  | 3,790,895 | <b>TS= (alzheimer* or cancer* or "cardiac failure" or dementia* or "heart failure" or multimorbid* or neoplasm* or parkinson* or "stroke")</b><br><i>Indexes=SCI-EXPANDED, SSCI, A&amp;HCI, CPCI-S, CPCI-SSH, ESCI Timespan=All years</i>                                                                                                                                                                                                                                                                                                             |
| # 1  | 1,658,624 | <b>TS= ("advanced age" or "aged" or "ageing" or "aging" or elder* or frail* or geriatr* or gerontolog* or "late* life" or "old age" or "old* adult*" or "old* client*" or "old* individual*" or "old* man" or "old* men" or "old* patient*" or "old* people" or "old* person*" or "old* population*" or "old* woman" or "old* women" or "oldest old" or "retired" or senior*)</b><br><i>Indexes=SCI-EXPANDED, SSCI, A&amp;HCI, CPCI-S, CPCI-SSH, ESCI Timespan=All years</i>                                                                          |

### 3. Search strategy and results in PsycInfo

Interface: Ovid

Field labels

Date of Search: 26 March 2021

Number of hits: 1,933

- exp/ = exploded controlled term
- / = non exploded controlled term
- .ti,ab,id. = title, abstract and author keywords
- adjx = within x words, regardless of order
- \* = truncation of word for alternate endings

Database(s): **APA PsycInfo** 1806 to March Week 3 2021

| #  | Searches                                                                                                                                                                                                                                                                                                                                   | Results |
|----|--------------------------------------------------------------------------------------------------------------------------------------------------------------------------------------------------------------------------------------------------------------------------------------------------------------------------------------------|---------|
| 1  | Older Adulthood/                                                                                                                                                                                                                                                                                                                           | 6645    |
| 2  | Geriatric patients/                                                                                                                                                                                                                                                                                                                        | 13619   |
| 3  | exp Aging/                                                                                                                                                                                                                                                                                                                                 | 77653   |
| 4  | (advanced age or aged or ageing or aging or elder* or frail* or geriatr* or gerontolog* or late* life or old age or old* adult* or old* client* or old* individual* or old* man or old* men or old* patient* or old* people or old* person* or old* population* or old* woman or old* women or oldest old or retired or senior*).ti,ab,id. | 470458  |
| 5  | Dementia/ or exp Presenile dementia/                                                                                                                                                                                                                                                                                                       | 76186   |
| 6  | (dementia* or alzheimer*).ti,ab,id.                                                                                                                                                                                                                                                                                                        | 104258  |
| 7  | exp Neoplasms/                                                                                                                                                                                                                                                                                                                             | 54065   |
| 8  | (neoplasm* or cancer*).ti,ab,id.                                                                                                                                                                                                                                                                                                           | 65816   |
| 9  | Cerebrovascular accidents/                                                                                                                                                                                                                                                                                                                 | 21623   |
| 10 | stroke.ti,ab,id.                                                                                                                                                                                                                                                                                                                           | 34513   |
| 11 | exp Parkinson's disease/                                                                                                                                                                                                                                                                                                                   | 25813   |
| 12 | parkinson*.ti,ab,id.                                                                                                                                                                                                                                                                                                                       | 35346   |
| 13 | Comorbidity/                                                                                                                                                                                                                                                                                                                               | 34018   |
| 14 | multimorbid*.ti,ab,id.                                                                                                                                                                                                                                                                                                                     | 1051    |
| 15 | (heart failure or cardiac failure).ti,ab,id.                                                                                                                                                                                                                                                                                               | 4153    |
| 16 | or/1-15                                                                                                                                                                                                                                                                                                                                    | 686012  |
| 17 | Caregivers/                                                                                                                                                                                                                                                                                                                                | 30033   |
| 18 | Elder care/                                                                                                                                                                                                                                                                                                                                | 4896    |
| 19 | (caregiv* or care giv* or caretak* or care tak* or carer*).ti,ab,id.                                                                                                                                                                                                                                                                       | 73654   |
| 20 | ((family or informal or unpaid) adj3 (care or caring)).ti,ab,id.                                                                                                                                                                                                                                                                           | 10822   |
| 21 | 17 or 18 or 19 or 20                                                                                                                                                                                                                                                                                                                       | 85126   |
| 22 | review.ti.                                                                                                                                                                                                                                                                                                                                 | 158155  |
| 23 | systematic* review*.ab,id.                                                                                                                                                                                                                                                                                                                 | 28501   |
| 24 | (meta analy* or metaanaly* or meta stud* or meta interpretation* or meta ethnograph* or meta summar* or meta synthes* or meta narrative* or mixed research synthes*).ti,ab,id.                                                                                                                                                             | 41992   |
| 25 | ((concept analy* or grounded theory) and review*).ab,id.                                                                                                                                                                                                                                                                                   | 1439    |
| 26 | 22 or 23 or 24 or 25                                                                                                                                                                                                                                                                                                                       | 196607  |
| 27 | 16 and 21 and 26                                                                                                                                                                                                                                                                                                                           | 2148    |
| 28 | (english or swedish or spanish or french or italian or german).lg.                                                                                                                                                                                                                                                                         | 4774945 |
| 29 | 27 and 28                                                                                                                                                                                                                                                                                                                                  | 2064    |
| 30 | limit 29 to yr="2000 -Current"                                                                                                                                                                                                                                                                                                             | 1950    |
| 31 | (editorial or letter).dt.                                                                                                                                                                                                                                                                                                                  | 67669   |
| 32 | 30 not 31                                                                                                                                                                                                                                                                                                                                  | 1933    |

## 4. Search strategy and results in Cinahl

Interface: Ebsco

Field labels

Date of Search: 26 March 2021

Number of hits: 2,523

- MH+ = exploded Cinahl Heading
- MH = non exploded Cinahl Heading
- TI = title
- AB = abstract
- Nx = within x words, regardless of order
- \* = truncation of word for alternate endings

| #   | Query                                                                                                                                                                                                                                                                                                                                                                                                                                                                                                                                                                                                                                                                                                                                          | Results   |
|-----|------------------------------------------------------------------------------------------------------------------------------------------------------------------------------------------------------------------------------------------------------------------------------------------------------------------------------------------------------------------------------------------------------------------------------------------------------------------------------------------------------------------------------------------------------------------------------------------------------------------------------------------------------------------------------------------------------------------------------------------------|-----------|
| S31 | S29 NOT S30                                                                                                                                                                                                                                                                                                                                                                                                                                                                                                                                                                                                                                                                                                                                    | 2,523     |
| S30 | PT Commentary or Editorial or Letter or Proceedings                                                                                                                                                                                                                                                                                                                                                                                                                                                                                                                                                                                                                                                                                            | 854,425   |
| S29 | S17 AND S21 AND S28                                                                                                                                                                                                                                                                                                                                                                                                                                                                                                                                                                                                                                                                                                                            | 2,590     |
|     | Limiters - Published Date: 20000101-20211231;<br>Language: English, French, German, Italian, Swedish                                                                                                                                                                                                                                                                                                                                                                                                                                                                                                                                                                                                                                           |           |
| S28 | S22 OR S23 OR S24 OR S25 OR S26 OR S27                                                                                                                                                                                                                                                                                                                                                                                                                                                                                                                                                                                                                                                                                                         | 294,864   |
| S27 | AB (("concept analy*" or "grounded theory") and review*)                                                                                                                                                                                                                                                                                                                                                                                                                                                                                                                                                                                                                                                                                       | 1,376     |
| S26 | TI ( "meta analy*" or metaanaly* or "meta stud*" or "meta interpretation*" or "meta ethnograph*" or "meta summar*" or "meta syntheses*" or "meta narrative*" or "mixed research syntheses*" ) OR AB ( "meta analy*" or metaanaly* or "meta stud*" or "meta interpretation*" or "meta ethnograph*" or "meta summar*" or "meta syntheses*" or "meta narrative*" or "mixed research syntheses*" )                                                                                                                                                                                                                                                                                                                                                 | 80,611    |
| S25 | AB "systematic* review"                                                                                                                                                                                                                                                                                                                                                                                                                                                                                                                                                                                                                                                                                                                        | 67,592    |
| S24 | TI review                                                                                                                                                                                                                                                                                                                                                                                                                                                                                                                                                                                                                                                                                                                                      | 206,732   |
| S23 | PT (meta analysis or meta synthesis)                                                                                                                                                                                                                                                                                                                                                                                                                                                                                                                                                                                                                                                                                                           | 39,376    |
| S22 | PT systematic review                                                                                                                                                                                                                                                                                                                                                                                                                                                                                                                                                                                                                                                                                                                           | 110,054   |
| S21 | S18 OR S19 OR S20                                                                                                                                                                                                                                                                                                                                                                                                                                                                                                                                                                                                                                                                                                                              | 100,197   |
| S20 | TI ( ((family or informal or unpaid) N3 (care or caring)) ) OR AB ( ((family or informal or unpaid) N3 (care or caring)) )                                                                                                                                                                                                                                                                                                                                                                                                                                                                                                                                                                                                                     | 21,928    |
| S19 | TI ( caregiv* or "care giv*" or caretak* or "care tak*" or carer* ) OR AB ( caregiv* or "care giv*" or caretak* or "care tak*" or carer* )                                                                                                                                                                                                                                                                                                                                                                                                                                                                                                                                                                                                     | 74,717    |
| S18 | (MH "Caregivers")                                                                                                                                                                                                                                                                                                                                                                                                                                                                                                                                                                                                                                                                                                                              | 36,859    |
| S17 | S1 OR S2 OR S3 OR S4 OR S5 OR S6 OR S7 OR S8 OR S9 OR S10 OR S11 OR S12 OR S13 OR S14 OR S15 OR S16                                                                                                                                                                                                                                                                                                                                                                                                                                                                                                                                                                                                                                            | 1,828,415 |
| S16 | TI ( "heart failure" or "cardiac failure" ) OR AB ( "heart failure" or "cardiac failure" )                                                                                                                                                                                                                                                                                                                                                                                                                                                                                                                                                                                                                                                     | 55,501    |
| S15 | (MH "Heart Failure+")                                                                                                                                                                                                                                                                                                                                                                                                                                                                                                                                                                                                                                                                                                                          | 43,530    |
| S14 | TI multimorbid* OR AB multimorbid*                                                                                                                                                                                                                                                                                                                                                                                                                                                                                                                                                                                                                                                                                                             | 2,720     |
| S13 | (MH "Comorbidity")                                                                                                                                                                                                                                                                                                                                                                                                                                                                                                                                                                                                                                                                                                                             | 64,158    |
| S12 | TI parkinson* OR AB parkinson*                                                                                                                                                                                                                                                                                                                                                                                                                                                                                                                                                                                                                                                                                                                 | 27,885    |
| S11 | (MH "Parkinson Disease")                                                                                                                                                                                                                                                                                                                                                                                                                                                                                                                                                                                                                                                                                                                       | 22,600    |
| S10 | TI stroke OR AB stroke                                                                                                                                                                                                                                                                                                                                                                                                                                                                                                                                                                                                                                                                                                                         | 96,983    |
| S9  | (MH "Stroke+")                                                                                                                                                                                                                                                                                                                                                                                                                                                                                                                                                                                                                                                                                                                                 | 72,157    |
| S8  | TI ( neoplasm* or cancer* ) OR AB ( neoplasm* or cancer* )                                                                                                                                                                                                                                                                                                                                                                                                                                                                                                                                                                                                                                                                                     | 424,414   |
| S7  | (MH "Neoplasms+")                                                                                                                                                                                                                                                                                                                                                                                                                                                                                                                                                                                                                                                                                                                              | 570,301   |
| S6  | TI ( dementia* or alzheimer* ) OR AB ( dementia* or alzheimer* )                                                                                                                                                                                                                                                                                                                                                                                                                                                                                                                                                                                                                                                                               | 77,937    |
| S5  | (MH "Dementia") OR (MH "Dementia, Presenile+") OR (MH "Dementia, Senile+")                                                                                                                                                                                                                                                                                                                                                                                                                                                                                                                                                                                                                                                                     | 73,337    |
| S4  | TI ( ("advanced age" or aged or ageing or aging or elder* or frail* or geriatr* or gerontolog* or "late* life" or "old age" or "old* adult*" or "old* client*" or "old* individual*" or "old* man" or "old* men" or "old* patient*" or "old* people" or "old* person*" or "old* population*" or "old* woman" or "old* women" or "oldest old" or retired or senior*) ) OR AB ( ("advanced age" or aged or ageing or aging or elder* or frail* or geriatr* or gerontolog* or "late* life" or "old age" or "old* adult*" or "old* client*" or "old* individual*" or "old* man" or "old* men" or "old* patient*" or "old* people" or "old* person*" or "old* population*" or "old* woman" or "old* women" or "oldest old" or retired or senior*) ) | 452,573   |
| S3  | (MH "Frailty Syndrome")                                                                                                                                                                                                                                                                                                                                                                                                                                                                                                                                                                                                                                                                                                                        | 2,612     |
| S2  | (MH "Aging+")                                                                                                                                                                                                                                                                                                                                                                                                                                                                                                                                                                                                                                                                                                                                  | 56,337    |
| S1  | (MH "Aged+")                                                                                                                                                                                                                                                                                                                                                                                                                                                                                                                                                                                                                                                                                                                                   | 860,457   |

**Supplementary Table 3. Exclusion decisions based on high overlap among quantitative reviews\***

| Overlapping clusters (% of overlap)**                                                                                                                                                                                                                                                                                                                                   | Excluded reviews                                 | Rationale for the exclusion of overlapping reviews                                                                                                                                                                                                                                                                                                                                                                                                                                                                                                                                                                |
|-------------------------------------------------------------------------------------------------------------------------------------------------------------------------------------------------------------------------------------------------------------------------------------------------------------------------------------------------------------------------|--------------------------------------------------|-------------------------------------------------------------------------------------------------------------------------------------------------------------------------------------------------------------------------------------------------------------------------------------------------------------------------------------------------------------------------------------------------------------------------------------------------------------------------------------------------------------------------------------------------------------------------------------------------------------------|
| <b><i>Case management: excluded 2 out of 12 reviews</i></b>                                                                                                                                                                                                                                                                                                             |                                                  |                                                                                                                                                                                                                                                                                                                                                                                                                                                                                                                                                                                                                   |
| Cheng 2020 vs Weinbrecht 2016: 24.8%<br>Lee 2020 vs Weinbrecht 2016: 20.5%                                                                                                                                                                                                                                                                                              | Weinbrecht 2016                                  | Weinbrecht did not discuss findings on case management; we identified the category from the summary of included studies table. Lee and Cheng both discussed case management findings. Therefore, we decided to exclude Weinbrecht from this category.                                                                                                                                                                                                                                                                                                                                                             |
| Corvol 2017 vs Reilly 2015: 31.8%<br>Reilly 2015 vs Goeman 2016: 15.4%                                                                                                                                                                                                                                                                                                  | Corvol 2017                                      | Corvol and Reilly both focused on case management. Reilly was a Cochrane review and better structured for the purposes of this umbrella review. Therefore, we decided to exclude Corvol from this category. Goeman focused on support worker role, which made the review sufficiently different from others.                                                                                                                                                                                                                                                                                                      |
| <b><i>Psychosocial interventions: excluded 13 out of 35 reviews</i></b>                                                                                                                                                                                                                                                                                                 |                                                  |                                                                                                                                                                                                                                                                                                                                                                                                                                                                                                                                                                                                                   |
| Fu 2017 vs Gabriel 2020: 22.2%                                                                                                                                                                                                                                                                                                                                          | Fu 2017                                          | Fu and Gabriel both focused on caregivers of people with cancer. The quality of the reviews was similar. We decided to include Gabriel since it is more recent.                                                                                                                                                                                                                                                                                                                                                                                                                                                   |
| Hopwood 2018 vs Sin 2018: 22.1%<br>Hopwood 2018 vs Boots 2014: 38.9%<br>Hopwood 2018 vs Egan 2018: 20%<br>Boots 2014 vs Egan 2018: 20%<br>Egan 2018 vs Zhao 2019: 55.6%<br>Hopwood 2018 vs Zhao 2019: 13.5%<br>Hopwood 2018 vs Leng 2020: 24.3%                                                                                                                         | Boots 2014<br>Egan 2018<br>Zhao 2019             | Hopwood, Sin, Boots, Egan, Zhao and Leng all concerned internet-based interventions. All but Sin focused on dementia caregivers, so Sin was sufficiently different. Leng was recent (2020) and included meta-analysis. Egan and Zhao shared 55.6% of studies and were very similar, the only difference being the publication date. Between Hopwood and Boots, Hopwood was more recent. Between Hopwood and Zhao, Hopwood was more informative since it included 36 studies (Zhao includes 6 studies and 5 of them are also included by Hopwood). From this cluster, we decided to include Hopwood, Sin and Leng. |
| Egan 2018 vs Gonzalez-Fraile 2021: 22.7%<br>Gonzalez-Fraile 2021 vs Lins 2014: 21.1%<br>Gonzalez-Fraile 2021 vs Zhao 2019: 23.8%<br>Gonzalez-Fraile 2021 vs Leng 2020: 34.5%<br>Gonzalez-Fraile 2021 vs Lucero 2019: 15.8%                                                                                                                                              | Leng 2020<br>Lucero 2019                         | Gonzalez-Fraile was the most recent (2021) and a Cochrane review. We decided to exclude Egan (already excluded above), Leng, Zhao (already excluded above) and Lucero (similar topic, no meta-analysis). We included Lins because of narrower focus (concerns telephone-based interventions specifically).                                                                                                                                                                                                                                                                                                        |
| Lee 2020 vs Amador-Marin 2017: 25%<br>Lee 2020 vs Weinbrecht 2016: 20.5%<br>Lee 2020 vs Teahan 2020: 17.1%                                                                                                                                                                                                                                                              | Amador-Marin 2017<br>Weinbrecht 2016             | Lee and Teahan were most recent, each had more than 20 RCTs, and overlap between them was low. Thus, we decided to exclude Amador-Marin and Weinbrecht and instead include Teahan and Lee.                                                                                                                                                                                                                                                                                                                                                                                                                        |
| Cheng 2020 vs Weinbrecht 2016: 24.8%<br>Cheng 2020 vs Wiegmann 2021: 23.8%<br>Cheng 2020 vs Vandepitte 2016: 16.7%<br>Cheng 2020 vs Lins 2014: 7.3%<br>Cheng 2020 vs Zabihi 2020: 5%<br>Cheng 2020 vs Akarsu 2019: 5.1%<br>Cheng 2020 vs Hopkinson 2019: 6.8%<br>Cheng 2020 vs Jensen 2015: 7.1%<br>Cheng 2020 vs Reilly 2015: 6.7%<br>Cheng 2020 vs Teahan 2020: 14.8% | Cheng 2020<br>Vandepitte 2016<br>Weinbrecht 2016 | Cheng and Wiegmann were the largest and most recent reviews. However, the overlap between Cheng and most of the smaller reviews was substantial (9 smaller reviews overlapped moderately or highly with Cheng). Therefore, we decided to keep Wiegmann instead of Cheng, and included the rest of smaller overlapping reviews. In addition, we decided to exclude Vandepitte from this cluster. Weinbrecht was already excluded in the previous cluster.                                                                                                                                                          |

|                                                                                                                                                                                                                                                                                            |                                      |                                                                                                                                                                                                                                                                                                                                                                                                                                                                                                                                                                                                                    |
|--------------------------------------------------------------------------------------------------------------------------------------------------------------------------------------------------------------------------------------------------------------------------------------------|--------------------------------------|--------------------------------------------------------------------------------------------------------------------------------------------------------------------------------------------------------------------------------------------------------------------------------------------------------------------------------------------------------------------------------------------------------------------------------------------------------------------------------------------------------------------------------------------------------------------------------------------------------------------|
| Cheng 2020 vs GonzalezFraile 2021: 10.7%<br>Cheng 2020 vs Amador-Marin 2017: 7.8%<br>Cheng 2020 vs Lucero 2019: 5.1%<br>Cheng 2020 vs Piersol 2017: 11.5%                                                                                                                                  |                                      |                                                                                                                                                                                                                                                                                                                                                                                                                                                                                                                                                                                                                    |
| Egan 2018 vs Guay 2017: 17.6%<br>Egan 2018 vs Wang 2020: 25%<br>Egan 2018 vs Leng 2019: 50%<br>Zhao 2019 vs Leng 2019: 50%<br>Leng 2019 vs Guay 2017: 23.5%<br>Zhao 2019 vs Guay 2017: 28.6%<br>Zhao 2019 vs Wang 2020: 30%<br>Guay 2017 vs Wang 2020: 18.8%<br>Guay 2017 vs Sin 2018: 13% | Guay 2017                            | Zhao, Egan and Leng were already excluded in previous clusters. Between Guay and Sin, we decided to keep Sin, since it had 78 studies, while Guay included only 12. We included Wang from this cluster.                                                                                                                                                                                                                                                                                                                                                                                                            |
| Lins 2014 vs Lucero 2019: 15.8%                                                                                                                                                                                                                                                            | Lucero 2019                          | We already excluded Lucero in previous clusters. Lins was included.                                                                                                                                                                                                                                                                                                                                                                                                                                                                                                                                                |
| Hopkinson 2019 vs Vermooij-Dassen 2011: 26.3%                                                                                                                                                                                                                                              | Vermooij-Dassen 2011                 | Between Hopkinson and Vermooij-Dassen, both had meta-analysis and both were about Cognitive Behavioral Therapy exclusively. We decided to include Hopkinson, since it was more recent (2019 vs 2011) and had more studies.                                                                                                                                                                                                                                                                                                                                                                                         |
| Jensen 2015 vs Wiegelmann 2021: 25%<br>Teahan 2020 vs Wiegelmann 2021: 24.5%<br>Weinbrecht 2016 vs Wiegelmann 2021: 18.4%<br>Jensen 2015 vs Teahan 2020: 14.3%                                                                                                                             | Jensen 2015<br>Weinbrecht 2016       | We already excluded Weinbrecht in previous clusters. Between Jensen and Teahan, Teahan was more recent. Thus, we additionally excluded Jensen from this cluster.                                                                                                                                                                                                                                                                                                                                                                                                                                                   |
| Legg 2011 vs Minshall 2019: 19%                                                                                                                                                                                                                                                            | Legg 2011                            | Between Legg and Minshall, we decided to include Minshall since it was more recent (2019 vs 2011) and included more studies (31 vs 8).                                                                                                                                                                                                                                                                                                                                                                                                                                                                             |
| <b>Education and Skills building: excluded 12 out of 32 reviews</b>                                                                                                                                                                                                                        |                                      |                                                                                                                                                                                                                                                                                                                                                                                                                                                                                                                                                                                                                    |
| Legg 2011 vs Smith 2019: 22.2%<br>Pucciarelli 2020 vs Smith 2019: 22.2%<br>Legg 2011 vs Minshall 2019: 19%                                                                                                                                                                                 | Legg 2011                            | Smith had a wider focus, while Legg and Pucciarelli focused on caregivers of patients with stroke. Since the latter two did not have high enough overlap, we decided to include all three reviews. Between Legg and Minshall, we decided to include Minshall only since it was more recent (2019 vs 2011) and included more studies (31 vs 8).                                                                                                                                                                                                                                                                     |
| Fu 2017 vs Gabriel 2020: 22.2%                                                                                                                                                                                                                                                             | Fu 2017                              | Fu and Gabriel both focused on caregivers of people with cancer. The quality of the reviews was similar. We decided to include Gabriel since it was more recent.                                                                                                                                                                                                                                                                                                                                                                                                                                                   |
| Hopwood 2018 vs Sin 2018: 22.1%<br>Hopwood 2018 vs Boots 2014: 38.9%<br>Hopwood 2018 vs Egan 2018: 20%<br>Boots 2014 vs Egan 2018: 20%<br>Egan 2018 vs Zhao 2019: 55.6%<br>Hopwood 2018 vs Zhao 2019: 13.5%<br>Hopwood 2018 vs Leng 2020: 24.3%                                            | Boots 2014<br>Egan 2018<br>Zhao 2019 | Hopwood, Sin, Boots, Egan, Zhao and Leng all concerned internet-based interventions. All but Sin focused on dementia caregivers, so Sin was sufficiently different. Leng was recent (2020) and included meta-analysis. Egan and Zhao shared 55.6% of studies and were very similar, the only difference being the publication date. Between Hopwood and Boots, Hopwood was more recent. Between Hopwood and Zhao, Hopwood was more informative since it included 36 studies (Zhao includes 6 studies and 5 of them were also included by Hopwood). From this cluster, we decided to include Hopwood, Sin and Leng. |
| Egan 2018 vs Gonzalez-Fraile 2021: 22.7%<br>Gonzalez-Fraile 2021 vs Lins 2014: 21.1%<br>Gonzalez-Fraile 2021 vs Zhao 2019: 23.8%                                                                                                                                                           | Leng 2020<br>Lucero 2019             | Gonzalez-Fraile was the most recent (2021) and a Cochrane review. We decided to exclude Egan (already excluded above), Leng, Zhao (already excluded above) and Lucero (similar topic, no meta-                                                                                                                                                                                                                                                                                                                                                                                                                     |

|                                                                                |                   |                                                                                                                                                                                                |
|--------------------------------------------------------------------------------|-------------------|------------------------------------------------------------------------------------------------------------------------------------------------------------------------------------------------|
| Gonzalez-Fraile 2021 vs Leng 2020: 34.5%                                       |                   | analysis). We included Lins because of a narrower focus (concerns telephone-based interventions specifically).                                                                                 |
| Gonzalez-Fraile 2021 vs Lucero 2019: 15.8%                                     |                   |                                                                                                                                                                                                |
| Lee 2020 vs Amador-Marin 2017: 25%                                             | Amador-Marin 2017 | Lee and Teahan were most recent, each had more than 20 RCTs, and overlap between them was low. Thus, we decided to exclude                                                                     |
| Lee 2020 vs Weinbrecht 2016: 20.5%                                             | Weinbrecht 2016   | Amador-Marin and Weinbrecht and instead include Teahan and Lee.                                                                                                                                |
| Lee 2020 vs Teahan 2020: 17.1%                                                 |                   | Cheng and Wiegelmann were the largest and most recent reviews.                                                                                                                                 |
| Cheng 2020 vs Weinbrecht 2016: 24.8%                                           | Cheng 2020        | However, the overlap between Cheng and most of the smaller                                                                                                                                     |
| Cheng 2020 vs Wiegelmann 2021: 23.8%                                           | Vandepitte 2016   | reviews was substantial (9 smaller reviews overlapped moderately or                                                                                                                            |
| Cheng 2020 vs Vandepitte 2016: 16.7%                                           |                   | highly with Cheng). Therefore, we decided to keep Wiegelmann                                                                                                                                   |
| Cheng 2020 vs Lins 2014: 7.3%                                                  |                   | instead of Cheng, and included the rest of smaller overlapping                                                                                                                                 |
| Cheng 2020 vs Zabihi 2020: 5%                                                  |                   | reviews. In addition, we decided to exclude Vandepitte from this                                                                                                                               |
| Cheng 2020 vs Akarsu 2019: 5.1%                                                |                   | cluster. Therefore, we decided to exclude Weinbrecht (already                                                                                                                                  |
| Cheng 2020 vs Hopkinson 2019: 6.8%                                             |                   | excluded above) and Vandepitte (already excluded above) from this                                                                                                                              |
| Cheng 2020 vs Jensen 2015: 7.1%                                                |                   | cluster.                                                                                                                                                                                       |
| Cheng 2020 vs Reilly 2015: 6.7%                                                |                   |                                                                                                                                                                                                |
| Cheng 2020 vs Teahan 2020: 14.8%                                               |                   |                                                                                                                                                                                                |
| Cheng 2020 vs GonzalezFraile 2021: 10.7%                                       |                   |                                                                                                                                                                                                |
| Cheng 2020 vs Amador-Marin 2017: 7.8%                                          |                   |                                                                                                                                                                                                |
| Cheng 2020 vs Lucero 2019: 5.1%                                                |                   |                                                                                                                                                                                                |
| Cheng 2020 vs Piersol 2017: 11.5%                                              |                   |                                                                                                                                                                                                |
| Egan 2018 vs Guay 2017: 17.6%                                                  | Guay 2017         | Zhao, Egan and Leng were already excluded in previous clusters.                                                                                                                                |
| Egan 2018 vs Leng 2019: 50%                                                    |                   | Between Guay and Sin, we decided to keep Sin, since it had 78                                                                                                                                  |
| Zhao 2019 vs Leng 2019: 50%                                                    |                   | studies, while Guay included only 12.                                                                                                                                                          |
| Leng 2019 vs Guay 2017: 23.5%                                                  |                   |                                                                                                                                                                                                |
| Zhao 2019 vs Guay 2017: 28.6%                                                  |                   |                                                                                                                                                                                                |
| Guay 2017 vs Sin 2018: 13%                                                     |                   |                                                                                                                                                                                                |
| Lins 2014 vs Lucero 2019: 15.8%                                                |                   | We already excluded Lucero in previous clusters. Lins was included.                                                                                                                            |
| Jensen 2015 vs Wiegelmann 2021: 25%                                            | Jensen 2015       | We already excluded Weinbrecht in previous clusters. Between                                                                                                                                   |
| Teahan 2020 vs Wiegelmann 2021: 24.5%                                          |                   | Jensen and Teahan, Teahan was more recent. Thus, we additionally                                                                                                                               |
| Weinbrecht 2016 vs Wiegelmann 2021: 18.4%                                      |                   | excluded Jensen from this cluster.                                                                                                                                                             |
| Jensen 2015 vs Teahan 2020: 14.3%                                              |                   |                                                                                                                                                                                                |
| <b>Respite care: excluded 1 out of 6 reviews</b>                               |                   |                                                                                                                                                                                                |
| Shaw 2009 vs Mason 2007: 21.7%                                                 | Mason 2007        | Shaw was more recent and included more studies (104 vs 22). Thus, we decided to exclude Mason from this cluster.                                                                               |
| <b>Relaxation, physical activity, and leisure: excluded 1 out of 7 reviews</b> |                   |                                                                                                                                                                                                |
| Cheng 2020 vs Wiegelmann 2021: 23.8%                                           | Wiegelmann 2021   | Cheng and Wiegelmann were the largest and most recent reviews. Cheng included more studies on the topic, so we decided to exclude Wiegelmann from this cluster.                                |
| <b>Mindfulness: excluded 1 out of 6 reviews</b>                                |                   |                                                                                                                                                                                                |
| Liu 2018 vs Collins 2019: 30.8%                                                | Collins 2019      | All three reviews concerned mindfulness interventions for caregivers of people with dementia. Liu was a Cochrane review (but only included 5 studies), Shim included 20 studies. We decided to |
| Liu 2018 vs Shim 2020: 18.2%                                                   |                   | exclude Collins from this cluster.                                                                                                                                                             |

\*The number of qualitative reviews in each category was low and overlapping clusters were limited. Due to the scarcity of qualitative evidence and low overlap, we decided not to exclude any qualitative review based on this approach. For full information about overlap among qualitative reviews, see the Citation Matrix in Supplementary File 2.

\*\*We assessed clusters of reviews with very high (33 pairs), high (40 pairs) or moderate overlap (only if one is almost fully included in the other); see the Citation Matrix in Supplementary File 1 for the overlap among all included reviews after quality assessment.

Supplementary Table 4. Application of Hendricks et al.'s mega-aggregation framework synthesis method<sup>1</sup>

|                                                                                                                                                                                                                                                                                                                                                                                                                                                     |                                                                                                                                                                                         |                                                                                                                                                                                                                                                                                                                                                                                                                                                                                                                                                               |
|-----------------------------------------------------------------------------------------------------------------------------------------------------------------------------------------------------------------------------------------------------------------------------------------------------------------------------------------------------------------------------------------------------------------------------------------------------|-----------------------------------------------------------------------------------------------------------------------------------------------------------------------------------------|---------------------------------------------------------------------------------------------------------------------------------------------------------------------------------------------------------------------------------------------------------------------------------------------------------------------------------------------------------------------------------------------------------------------------------------------------------------------------------------------------------------------------------------------------------------|
| <b>Step 1: Identify a clearly defined review question and objectives</b>                                                                                                                                                                                                                                                                                                                                                                            |                                                                                                                                                                                         |                                                                                                                                                                                                                                                                                                                                                                                                                                                                                                                                                               |
| This umbrella review aims to explore the effectiveness of interventions targeting informal caregivers' physical and mental health. The fourth objective, which is the one mainly feeding on qualitative evidence, is as follows: how are the proposed interventions experienced by caregivers in terms of effectiveness and implementation outcomes?                                                                                                |                                                                                                                                                                                         |                                                                                                                                                                                                                                                                                                                                                                                                                                                                                                                                                               |
| <b>Step 2: Identify a theoretical framework or model</b>                                                                                                                                                                                                                                                                                                                                                                                            |                                                                                                                                                                                         |                                                                                                                                                                                                                                                                                                                                                                                                                                                                                                                                                               |
| Adapted version of Van Houtven et al.'s framework <sup>2,3</sup>                                                                                                                                                                                                                                                                                                                                                                                    | Intervention, Context of caregiving relationship, Caregiver, Care receiver, Caregiver knowledge, attitude and behaviors, Caregivers' experience of the intervention, Caregiver outcomes | The adapted framework describes the different determinants that affect the effectiveness of support interventions in addressing health outcomes of caregivers, and how they interact by modulating the other determinants and components                                                                                                                                                                                                                                                                                                                      |
| <b>Step 3: Decide on criteria for considering reviews for inclusion</b>                                                                                                                                                                                                                                                                                                                                                                             |                                                                                                                                                                                         |                                                                                                                                                                                                                                                                                                                                                                                                                                                                                                                                                               |
| Inclusion and exclusion criteria used to select reviews are presented in Table 1 of the published umbrella review protocol <sup>3</sup>                                                                                                                                                                                                                                                                                                             |                                                                                                                                                                                         |                                                                                                                                                                                                                                                                                                                                                                                                                                                                                                                                                               |
| <b>Step 4: Conduct searching and screening</b>                                                                                                                                                                                                                                                                                                                                                                                                      |                                                                                                                                                                                         |                                                                                                                                                                                                                                                                                                                                                                                                                                                                                                                                                               |
| The following databases were searched from 1 January 2000 to 26 March 2021: Medline, CINAHL, PsycINFO and Web of Science. In addition, we performed a manual search of the reference lists of included reviews                                                                                                                                                                                                                                      | Screening was done independently and in duplicate by MK and ACL; MK and LM; MK and LS; MK and LD                                                                                        |                                                                                                                                                                                                                                                                                                                                                                                                                                                                                                                                                               |
| <b>Step 5: Conduct quality appraisal of the included studies</b>                                                                                                                                                                                                                                                                                                                                                                                    |                                                                                                                                                                                         |                                                                                                                                                                                                                                                                                                                                                                                                                                                                                                                                                               |
| An <i>ad hoc</i> tool was used, developed and piloted by review authors                                                                                                                                                                                                                                                                                                                                                                             | Quality appraisal was done independently and induplicate by all co-authors                                                                                                              | Reviews of critically low quality were excluded (i.e., those that had 2 or more critical items missing or not reported); 18 reviews contributed to the next step                                                                                                                                                                                                                                                                                                                                                                                              |
| <b>Step 6: Data extraction and categorization</b>                                                                                                                                                                                                                                                                                                                                                                                                   |                                                                                                                                                                                         |                                                                                                                                                                                                                                                                                                                                                                                                                                                                                                                                                               |
| AA, ACL and MK read all reviews                                                                                                                                                                                                                                                                                                                                                                                                                     | AA and MK extracted the verbatims and each verified the extraction of the other co-author                                                                                               | Construction of fourth-order constructs (codes, categories, and aggregations) was done in consensus by AA and MK, and then reviewed by third co-author ACL. In the case of codes and categories not fitting the framework, they were inductively abstracted and new themes were generated and added to the framework. All three co-authors then reviewed and discussed the process until consensus was reached by all three co-authors. The results of the categorization and aggregation was then shared with the other co-authors and consensus was reached |
| <b>Step 7: Present and synthesize the findings</b>                                                                                                                                                                                                                                                                                                                                                                                                  |                                                                                                                                                                                         |                                                                                                                                                                                                                                                                                                                                                                                                                                                                                                                                                               |
| Two themes were constructed (intervention outcomes and implementation outcomes) using 200 codes, with further groupings of codes in categories and sub-categories                                                                                                                                                                                                                                                                                   | Evidence gaps and lines of actions were identified following convergence of the qualitative and quantitative findings, and were later presented in the discussion                       |                                                                                                                                                                                                                                                                                                                                                                                                                                                                                                                                                               |
| <b>Step 8: Transparent reporting</b>                                                                                                                                                                                                                                                                                                                                                                                                                |                                                                                                                                                                                         |                                                                                                                                                                                                                                                                                                                                                                                                                                                                                                                                                               |
| PRIOR <sup>4</sup> reporting guideline were used as far as possible. The protocol was published ( <a href="https://doi.org/10.1136/bmjopen-2021-053117">doi:10.1136/bmjopen-2021-053117</a> ) and the categorization and aggregation of the third-order constructs to develop the fourth-order constructs was shown in supplementary files. Additionally, differences between the protocol and the manuscript were reported in supplementary files. |                                                                                                                                                                                         |                                                                                                                                                                                                                                                                                                                                                                                                                                                                                                                                                               |

## References

- Hendricks L, Eshun-Wilson I, Rohwer A. A mega-aggregation framework synthesis of the barriers and facilitators to linkage, adherence to ART and retention in care among people living with HIV. *Syst Rev*. 2021;10(1):1-28. doi:10.1186/s13643-021-01582-z
- Van Houtven CH, Voils CI, Weinberger M. An organizing framework for informal caregiver interventions: Detailing caregiving activities and caregiver and care recipient outcomes to optimize evaluation efforts. *BMC Geriatr*. 2011;11. doi:10.1186/1471-2318-11-77
- Calderón-Larrañaga A, Kirvalidze M, Dahlberg L, Sacco LB, Morin L. Effectiveness of interventions to address the negative health outcomes of informal caregiving to older adults: Protocol for an umbrella review. *BMJ Open*. 2021;11(11). doi:10.1136/bmjopen-2021-053117
- Gates M, Gates A, Pieper D, et al. Reporting guideline for overviews of reviews of healthcare interventions: The Preferred Reporting Items for Overviews of Reviews (PRIOR) statement. *MetaArXiv*. Published online 2022. doi:10.31222/osf.io/82wau

Supplementary Table 5a. AMSTAR-2 quality assessment tool for quantitative reviews

| High                  | Moderate              | Low                | Critically low (excluded) |                     |
|-----------------------|-----------------------|--------------------|---------------------------|---------------------|
| Maayan, 2014          | Cheng, 2020           | Amador-Marin, 2017 | AlDaken, 2018             | Van'tLeven, 2013    |
| Forster, 2012         | Minshall, 2019        | Egan, 2018         | Bergstrom, 2018           | Zhu, 2021           |
| Liu, 2018             | Smith, 2019           | Gabriel, 2020      | Brodaty, 2003             | Wang, 2017          |
| Reilly, 2015          | Gonzalez-Fraile, 2021 | Heckel, 2019       | Bustillo, 2018            | Peacock, 2003       |
| Vernooij-Dassen, 2011 | Wang, 2020            | Hopwood, 2018      | Cheng, 2014               | Northouse, 2010     |
| Goeman, 2016          | Akarsu, 2019          | Irons, 2020        | Dam, 2016                 | Dharmawardene, 2016 |
|                       | Corry, 2019           | Leng, 2020         | EluvathingolJose, 2013    | Brereton, 2007      |
|                       | Legg, 2011            | Shaw, 2009         | Grandi, 2019              | Liu, 2017           |
|                       | Lins, 2014            | Shim, 2020         | Hopkinson, 2012           | Thompson, 2007      |
|                       | Pucciarelli, 2020     | Teahan, 2020       | Irani, 2020               | Eldred, 2008        |
|                       | Sin, 2018             | Zhao, 2019         | Kedia, 2020               | Regan, 2012         |
|                       | Lucero, 2019          | Collins, 2019      | Kor, 2018                 | Heynsbergh, 2018    |
|                       | Treanor, 2019         | Guay, 2017         | Lee, 2007                 | Abrahams, 2018      |
|                       |                       | Lee, 2020          | Li, 2020                  | Li, 2016            |
|                       |                       | Mason, 2007        | Li, 2014                  | Jackson, 2016       |
|                       |                       | Vandepitte, 2016   | Luo, 2020                 | You, 2012           |
|                       |                       | Waldron, 2013      | Ruggiano, 2018            | Lambert, 2016       |
|                       |                       | Weinbrecht, 2016   | Selwood, 2007             | Domingues, 2018     |
|                       |                       | Zabihi, 2020       | Sherifali, 2018           | Miles, 2020         |
|                       |                       | Boots, 2014        | Smith, 2014               | Scott, 2016         |
|                       |                       | Corvol, 2017       | Spencer, 2019             | Hurley, 2014        |
|                       |                       | Cuthbert, 2017     | ZabaleguiYarnoz, 2008     | Exeberria, 2020     |
|                       |                       | Doyle, 2020        | Bourne, 2020              | Deeken, 2019        |
|                       |                       | Fu, 2017           | Bunn, 2016                | Hempel, 2008        |
|                       |                       | Hopkinson, 2019    | Byeon, 2020               | Fange, 2020         |
|                       |                       | Jensen, 2015       | Caress, 2009              | Lally, 2016         |
|                       |                       | Maffioletti, 2019  | Cassidy, 2021             | Ussher, 2009        |
|                       |                       | Parkinson, 2019    | Epps, 2021                | Stahl, 2016         |
|                       |                       | Bennett, 2019      | Frias, 2020               | Mantovan, 2010      |
|                       |                       | Wiegmann, 2021     | Kaddour, 2018             | Panzeri, 2019       |
|                       |                       | Greenwood, 2016    | Kaltenbaugh, 2015         | Poon, 2019          |
|                       |                       | Piersol, 2017      | Kwon, 2017                | Pritchard, 2020     |
|                       |                       |                    | Laver, 2017               | Xu, 2020            |
|                       |                       |                    | Leung, 2017               | Ahn, 2020           |
|                       |                       |                    | Lorca-Cabrera, 2020       | Chien, 2011         |
|                       |                       |                    | Mason, 2007               | Cooper, 2007        |
|                       |                       |                    | McKechnie, 2014           | Corbett, 2012       |
|                       |                       |                    | Pinquart, 2006            | Du Preez, 2018      |
|                       |                       |                    | Pleasant, 2020            | Elvish, 2013        |
|                       |                       |                    | Pusey, 2001               | Kleine, 2019        |
|                       |                       |                    | Smits, 2007               | Lee, 2020           |
|                       |                       |                    | Vandepitte, 2016          | Mason, 2008         |
|                       |                       |                    | Verreault, 2021           | MoleroJurado, 2020  |
|                       |                       |                    | Waller, 2017              | Moon, 2013          |
|                       |                       |                    | Walter, 2020              | Moore, 2020         |
|                       |                       |                    | Wu, 2019                  | O'Toole, 2017       |

The definitions of each quality category, critical items and recommendations on grading are available from the original publication: Shea BJ, Reeves BC, Wells G, et al. AMSTAR 2: A critical appraisal tool for systematic reviews that include randomised or non-randomised studies of healthcare interventions, or both. *BMJ*. 2017;358:j4008. doi:10.1136/bmj.j4008.

Supplementary Table 5b. *Ad hoc* quality assessment tool\* for qualitative reviews

| Qualitative reviews with 2 or more critical flaws** | Qualitative reviews less than 2 critical flaw** |
|-----------------------------------------------------|-------------------------------------------------|
| Jackson, 2016                                       | Parkinson, 2019                                 |
| Sousa, 2016                                         | Sin, 2018                                       |
| Hempel, 2008                                        | Goeman, 2016                                    |
| Armstrong, 2019                                     | Li, 2016                                        |
| Elvish, 2013                                        | Miles, 2020                                     |
| Moon, 2013                                          | Boots, 2014                                     |
| Caress, 2009                                        | Du Preez, 2018                                  |
| EluvathingolJose, 2013                              | Lins, 2014                                      |
| Heckel, 2019                                        | Maffioletti, 2019                               |
|                                                     | Pritchard, 2020                                 |
|                                                     | Bourne, 2020                                    |
|                                                     | Bunn, 2016                                      |
|                                                     | AlDaken, 2018                                   |
|                                                     | Dam, 2016                                       |
|                                                     | Hopwood, 2018                                   |
|                                                     | Irons, 2020                                     |
|                                                     | Shaw, 2009                                      |
|                                                     | Smith, 2014                                     |

\*The tool can be accessed in the published protocol (doi:10.1136/bmjopen-2021-053117).

\*\*Critical flaws included: transparency and comprehensiveness of the literature search (item #3), using at least two databases for the search (item #4), assessment of methodological quality of primary studies using explicit criteria (item #7), involvement of two or more researchers in data synthesis process (item #11).

**Supplementary Table 6. Repository of all included reviews (*n*=47)**

| Author, year               | Countries of primary studies                               | Study design                                 | Databases searched                                                                                                                                                               | End date of literature search | # studies included in the umbrella review | # participants, mean age, % female                          | Intervention type                                   | Disease of care receiver | Health outcomes of caregiver | Review type and synthesis method     | Quantitative, qualitative, or mixed-methods |
|----------------------------|------------------------------------------------------------|----------------------------------------------|----------------------------------------------------------------------------------------------------------------------------------------------------------------------------------|-------------------------------|-------------------------------------------|-------------------------------------------------------------|-----------------------------------------------------|--------------------------|------------------------------|--------------------------------------|---------------------------------------------|
| Akarsu, 2019 <sup>1</sup>  | US                                                         | RCTs                                         | Embase, cinahl, medline, psycinfo, psycarticles, assia, central, sociological abstracts, spp                                                                                     | 2015                          | 13                                        | 2056 caregivers, mean age 59 (SD=11.36), 86% female         | Psychosocial, Education and skills                  | Dementia                 | Depression                   | Systematic review with meta-analysis | Quantitative                                |
| Aldaken, 2018 <sup>2</sup> | UK, China, Iran                                            | RCTs, incl. some with qualitative interviews | Ebsco, google scholar, science direct                                                                                                                                            | 2017                          | 1                                         | NA                                                          | Mindfulness                                         | Cancer                   | NA                           | Systematic review                    | Qualitative                                 |
| Bennett, 2019 <sup>3</sup> | US, Germany, Netherlands, UK, Hong Kong, Australia, Brazil | RCTs                                         | Medline, embase, central, cumulative index to nursing and allied health literature, psycinfo, education resources information Centre, otseeker, pedro, clinical trial registries | Feb-2018                      | 15                                        | 2063 dyads, mean age 65, 20%-90% of caregivers were spouses | Education and skills                                | Dementia                 | Emotional distress, HR-QoL   | Systematic review with meta-analysis | Quantitative                                |
| Boots, 2014 <sup>4</sup>   | NA                                                         | Any                                          | Pubmed, psycinfo, cinahl, web of science, cochrane library                                                                                                                       | Jan-2013                      | 4                                         | NA                                                          | Psychosocial, Education and skills                  | Dementia                 | NA                           | Systematic review                    | Qualitative                                 |
| Bourne, 2020 <sup>5</sup>  | UK, US, Australia, New Zealand                             | Qualitative and mixed method                 | Psycinfo, medline, web of science, assia, google scholar                                                                                                                         | Mar-2020                      | 10                                        | NA                                                          | Relaxation and leisure                              | Dementia                 | NA                           | Systematic review                    | Qualitative                                 |
| Bunn, 2016 <sup>6</sup>    | UK                                                         | Any                                          | Medline, cinahl, scopus, nhs evidence, cochrane library, google scholar                                                                                                          | Nov-2012                      | 5                                         | NA                                                          | Case management, Psychosocial, Education and skills | Dementia                 | NA                           | Systematic review                    | Qualitative                                 |

| Author, year                 | Countries of primary studies                                                                                                        | Study design                                               | Databases searched                                                                                                  | End date of literature search | # studies included in the umbrella review | # participants, mean age, % female              | Intervention type                   | Disease of care receiver | Health outcomes of caregiver                                                         | Review type and synthesis method     | Quantitative, qualitative, or mixed-methods |
|------------------------------|-------------------------------------------------------------------------------------------------------------------------------------|------------------------------------------------------------|---------------------------------------------------------------------------------------------------------------------|-------------------------------|-------------------------------------------|-------------------------------------------------|-------------------------------------|--------------------------|--------------------------------------------------------------------------------------|--------------------------------------|---------------------------------------------|
| Cheng, 2020 <sup>7</sup>     | US, Australia, Brazil, Denmark, Norway, UK, Spain, Greece, Finland, India, Netherlands, Germany, Egypt, Japan, Iran, Canada, Taiwan | RCTs, quasi-experimental                                   | Psycinfo, medline, cinahl                                                                                           | Mid-2018                      | 37                                        | NA                                              | Relaxation and leisure, Mindfulness | Dementia                 | Depression, anxiety, HR-QoL, physical health                                         | Systematic review with meta-analysis | Quantitative                                |
| Corry, 2019 <sup>8</sup>     | NA                                                                                                                                  | RCTs, quasi-experimental                                   | Central, medline, embase, psycinfo, proquest, cinahl                                                                | Nov-2018                      | 21                                        | 1690 caregivers, age range 19-87, >70.5% female | Psychosocial, Education and skills  | Any                      | HR-QoL, psychological health (depression, anxiety), physical health                  | Systematic review with meta-analysis | Quantitative                                |
| Cuthbert, 2017 <sup>9</sup>  | NA                                                                                                                                  | RCTs, quasi-experimental                                   | Medline, pubmed, cinahl                                                                                             | Sep-2015                      | 14                                        | 12-137 caregivers, age range 41-73.7            | Relaxation and leisure              | Any                      | Depression, anxiety, well-being, QoL, physical strengthening, blood pressure, weight | Systematic review                    | Quantitative                                |
| Dam, 2016 <sup>10</sup>      | NA                                                                                                                                  | Any                                                        | Pubmed, psycinfo, cinahl, web of science, cochrane library                                                          | May-2015                      | 4                                         | NA                                              | Psychosocial                        | Dementia                 | NA                                                                                   | Systematic review                    | Qualitative                                 |
| Doyle, 2020 <sup>11</sup>    | NA                                                                                                                                  | RCTs, quasi-experimental, case-control, and cohort studies | Pubmed, web of science, cinahl plus, cochrane library, ot seeker, psycinfo, scopus                                  | Apr-2017                      | 11                                        | 862 caregivers, mean age 67, 69.4% female       | Relaxation and leisure              | Any                      | Depression, anxiety, physical health                                                 | Systematic review                    | Quantitative                                |
| Du Preez, 2018 <sup>12</sup> | NA                                                                                                                                  | Qualitative studies and mixed methods                      | Pubmed, web of science, medical database (proquest), medline, bmj best practice, scopus, psycinfo, otseeker, cinahl | Nov-2016                      | 10                                        | NA                                              | Respite                             | Dementia                 | NA                                                                                   | Integrative review                   | Qualitative                                 |

| Author, year                        | Countries of primary studies                                      | Study design                | Databases searched                                                                                                                                  | End date of literature search | # studies included in the umbrella review | # participants, mean age, % female                                       | Intervention type                                   | Disease of care receiver | Health outcomes of caregiver                        | Review type and synthesis method     | Quantitative, qualitative, or mixed-methods |
|-------------------------------------|-------------------------------------------------------------------|-----------------------------|-----------------------------------------------------------------------------------------------------------------------------------------------------|-------------------------------|-------------------------------------------|--------------------------------------------------------------------------|-----------------------------------------------------|--------------------------|-----------------------------------------------------|--------------------------------------|---------------------------------------------|
| Forster, 2012 <sup>13</sup>         | US, UK, Australia, Sweden, the Netherlands, Taiwan, Thailand      | RCTs                        | Cochrane library, dare, eed, hta database, medline, embase, cinahl, psycinfo                                                                        | Jun-2012                      | 21                                        | 1290 caregivers                                                          | Case management, Psychosocial, Education and skills | Stroke                   | Depression, HR-QoL                                  | Systematic review                    | Quantitative                                |
| Gabriel, 2020 <sup>14</sup>         | US, France                                                        | RCTs, quasi-experimental    | Pubmed, medline, cinahl, psycinfo, web of science, who clinical trials registry, international standard rct registry                                | 2019                          | 12                                        | 3390 participants (including caregivers), age range for caregivers 43-61 | Psychosocial, Education and skills                  | Cancer                   | Psychological/emotional and physical domains of QoL | Systematic review                    | Quantitative                                |
| Goeman, 2016 <sup>15</sup>          | Hong Kong, Netherlands, US, Italy, Finland, UK, Canada, Australia | Any                         | Medline, cinahl, psycinfo, google scholar                                                                                                           | Dec-2014                      | 36                                        | NA                                                                       | Case management                                     | Dementia                 | Depression, HR-QoL, general health                  | Systematic review                    | Mixed methods                               |
| Gonzalez-Fraile, 2021 <sup>16</sup> | US, China, Netherlands, France, Canada, Spain, UK                 | RCTs                        | Alois, specialised register of the cochrane dementia and cognitive improvement group                                                                | Apr-2020                      | 26                                        | 2367 caregivers, median age 63, 72% female                               | Psychosocial, Education and skills                  | Dementia                 | Depression, depressive symptoms, HR-QoL             | Systematic review with meta-analysis | Quantitative                                |
| Greenwood, 2016 <sup>17</sup>       | US, Spain                                                         | RCTs and quasi-experimental | Medline, embase, cochrane library, psycinfo; cinahl plus, applied social sciences index, abstracts and healthcare management information consortium | Jul-2015                      | 4                                         | 447 caregivers, age range 61-72, mostly female                           | Case management, Psychosocial, Education and skills | Dementia, stroke         | Depression, general health                          | Systematic review                    | Quantitative                                |
| Li, 2016 <sup>18</sup>              | US, the Netherlands, China, Canada                                | Any                         | Cochrane library, pubmed, medline, cinahl, psycinfo, web of science, cnki, wanfang data, vip                                                        | Feb-2015                      | 6                                         | NA                                                                       | Mindfulness                                         | Any                      | NA                                                  | Systematic review                    | Qualitative                                 |
| Heckel, 2019 <sup>19</sup>          | Australia                                                         | RCTs and quasi-experimental | Medline, cinahl, psycinfo, embase                                                                                                                   | May-2018                      | 2                                         | NA                                                                       | Psychosocial, Education and skills                  | Cancer                   | Depression, emotional distress                      | Systematic review                    | Quantitative                                |

| Author, year                  | Countries of primary studies                                                                | Study design                | Databases searched                                                                                         | End date of literature search | # studies included in the umbrella review | # participants, mean age, % female           | Intervention type                                                           | Disease of care receiver                                              | Health outcomes of caregiver                   | Review type and synthesis method                | Quantitative, qualitative, or mixed-methods |
|-------------------------------|---------------------------------------------------------------------------------------------|-----------------------------|------------------------------------------------------------------------------------------------------------|-------------------------------|-------------------------------------------|----------------------------------------------|-----------------------------------------------------------------------------|-----------------------------------------------------------------------|------------------------------------------------|-------------------------------------------------|---------------------------------------------|
| Hopkinson, 2019 <sup>20</sup> | Spain, US, UK, Germany, Canada, Brazil, Italy                                               | RCTs and quasi-experimental | Medline, embase, cinahl, psycinfo, cochrane library                                                        | Jan-2017                      | 25                                        | Age range 56.6-72.6                          | Psychosocial                                                                | Dementia                                                              | Depression, anxiety                            | Systematic review with meta-analysis            | Quantitative                                |
| Hopwood, 2018 <sup>21</sup>   | US, the Netherlands, Spain, Poland, Denmark, Hong Kong, Canada, France, UK, Germany         | Any                         | Cinahl, cochrane library, embase, medline, psycinfo, web of science                                        | Apr-2018                      | 31                                        | NA                                           | Case management, Psychosocial, Education and skills                         | Dementia                                                              | HR-QoL, depression, anxiety, self-rated health | Systematic review                               | Mixed methods                               |
| Irons, 2020 <sup>22</sup>     | Australia, UK, US, Israel                                                                   | Any                         | Medline, pubmed, ebsco, cinahl, embase, psycinfo, cochrane library, scopus, web of science, google scholar | May-2019                      | 17                                        | NA                                           | Relaxation and leisure                                                      | Neurological conditions (e.g., dementia, stroke, Parkinson's disease) | HR-QoL, anxiety, depression                    | Integrative systematic review, meta-ethnography | Mixed methods                               |
| Lee, 2020 <sup>23</sup>       | US, UK, Germany, Spain, Netherlands, Portugal, China, Russia, Peru, Brazil, Denmark, Greece | RCTs                        | Medline, cinahl, psycinfo, cochrane library                                                                | 2017                          | 26                                        | 3906 caregivers, mean age 60.5, 73.9% female | Case management, Psychosocial, Education and skills, Relaxation and leisure | Dementia                                                              | HR-QoL                                         | Systematic review with meta-analysis            | Quantitative                                |

| Author, year                    | Countries of primary studies                                                                | Study design                     | Databases searched                                                                                                                                                                                                                                                               | End date of literature search | # studies included in the umbrella review | # participants, mean age, % female               | Intervention type                  | Disease of care receiver | Health outcomes of caregiver                        | Review type and synthesis method     | Quantitative, qualitative, or mixed-methods |
|---------------------------------|---------------------------------------------------------------------------------------------|----------------------------------|----------------------------------------------------------------------------------------------------------------------------------------------------------------------------------------------------------------------------------------------------------------------------------|-------------------------------|-------------------------------------------|--------------------------------------------------|------------------------------------|--------------------------|-----------------------------------------------------|--------------------------------------|---------------------------------------------|
| Lins, 2014 <sup>24</sup>        | US, Germany, Canada                                                                         | Any                              | Cochrane dementia and cognitive improvement group's specialized register, cochrane library, medline, medline in process, embase, cinahl, psyn dex, psycinfo, web of science, dimdi databases, springer database, science direct, trial registers, web of science, google scholar | Feb-2013                      | 11                                        | NA                                               | Psychosocial, Education and skills | Dementia                 | Depression, anxiety                                 | Systematic review with meta-analysis | Mixed methods                               |
| Liu, 2018 <sup>25</sup>         | US, China                                                                                   | RCTs and quasi-experimental      | Alois, specialised register of the cochrane dementia and cognitive improvement group                                                                                                                                                                                             | Sep-2017                      | 5                                         | 201 caregivers, age range 57.5-71.3, >80% female | Mindfulness                        | Dementia                 | Depressive symptoms, anxiety                        | Systematic review with meta-analysis | Quantitative                                |
| Lucero, 2019 <sup>26</sup>      | NA                                                                                          | RCTs                             | Pubmed, cinahl, web of science, psycinfo                                                                                                                                                                                                                                         | Jul-2017                      | 12                                        | NA                                               | Case management                    | Dementia                 | Depression, anxiety                                 | Systematic review                    | Quantitative                                |
| Maayan, 2014 <sup>27</sup>      | US, Canada                                                                                  | RCTs                             | Alois, specialised register of the cochrane dementia and cognitive improvement group                                                                                                                                                                                             | Dec-2012                      | 4                                         | NA                                               | Respite                            | Dementia                 | Depression                                          | Systematic review                    | Quantitative                                |
| Maffioletti, 2019 <sup>28</sup> | US, the Netherlands, Norway, Scotland, Iceland, HongKong, Australia, Italy, Sweden, Germany | Any                              | Pubmed, psycinfo, scopus, scielo                                                                                                                                                                                                                                                 | Aug-2018                      | 21                                        | NA                                               | Respite                            | Dementia                 | Depression, psychological well-being, health status | Systematic review                    | Mixed methods                               |
| Miles, 2020 <sup>29</sup>       | NA                                                                                          | Any design with comparison group | Medline, embase, web of science, cinahl, pubmed, scopus, psycinfo, cochrane library                                                                                                                                                                                              | Sep-2018                      | 2                                         | NA                                               | Psychosocial, Education and skills | Dementia                 | NA                                                  | Systematic review                    | Qualitative                                 |

| Author, year                    | Countries of primary studies                  | Study design                | Databases searched                                                                                                | End date of literature search | # studies included in the umbrella review | # participants, mean age, % female                          | Intervention type                                                           | Disease of care receiver | Health outcomes of caregiver                 | Review type and synthesis method                                                                    | Quantitative, qualitative, or mixed-methods |
|---------------------------------|-----------------------------------------------|-----------------------------|-------------------------------------------------------------------------------------------------------------------|-------------------------------|-------------------------------------------|-------------------------------------------------------------|-----------------------------------------------------------------------------|--------------------------|----------------------------------------------|-----------------------------------------------------------------------------------------------------|---------------------------------------------|
| Minshall, 2019 <sup>30</sup>    | NA                                            | RCTs                        | Medline, cinahl, psycinfo, socindex, cochrane library, web of science, Scopus databases, grey literature          | Sep-2018                      | 21                                        | 2079 caregivers, age range 49-76                            | Psychosocial, Education and skills                                          | Stroke                   | Depression, HR-QoL                           | Systematic review with meta-analysis                                                                | Quantitative                                |
| Parkinson, 2019 <sup>31</sup>   | NA                                            | Any                         | Amed, central, cinahl, medline, nursing and allied health database, psycarticles, psycinfo                        | 2017                          | 9                                         | 215 caregivers, age range 48.5-65.6                         | Mindfulness                                                                 | Any                      | Anxiety                                      | Systematic review                                                                                   | Mixed methods                               |
| Piersol, 2017 <sup>32</sup>     | NA                                            | Any                         | Medline, psycinfo, cinahl, otseeker, cochrane database of systematic reviews                                      | Apr-2014                      | 43                                        | NA                                                          | Case management, Psychosocial, Education and skills, Relaxation and leisure | Dementia                 | HR-QoL, depression, anxiety, physical health | Systematic review                                                                                   | Quantitative                                |
| Pritchard, 2020 <sup>33</sup>   | US, Australia, Europe                         | Qualitative                 | Medline, cochrane database of systematic reviews, embase, emcare, cinahl, otseeker                                | May-2018                      | 7                                         | 9-495 caregivers, age range 59.8 (SD=13.9) to 68.7 (SD=8.6) | Education and skills                                                        | Dementia                 | NA                                           | Systematic review with meta-analysis, qualitative synthesis (thematic analysis, framework approach) | Qualitative                                 |
| Pucciarelli, 2020 <sup>34</sup> | UK, Spain, Netherlands, US, Taiwan, Australia | RCTs and quasi-experimental | Pubmed, cinahl, psycinfo                                                                                          | May-2019                      | 16                                        | 2187 caregivers, mean age 58, 75% female                    | Case management, Psychosocial, Education and skills                         | Stroke                   | Depression, HR-QoL                           | Systematic review with meta-analysis                                                                | Quantitative                                |
| Reilly, 2015 <sup>35</sup>      | Hong Kong, Netherlands, US, India, Canada, UK | RCTs                        | Cochrane library, medline, embase, psycinfo, cinahl, lilacs, web of science, campbell collaboration/soro database | Mar-2014                      | 11                                        | NA                                                          | Case management                                                             | Dementia                 | HR-QoL, depression, general health           | Systematic review with meta-analysis                                                                | Quantitative                                |

| Author, year              | Countries of primary studies                                                                                              | Study design | Databases searched                                                                                                                                                                                       | End date of literature search | # studies included in the umbrella review | # participants, mean age, % female | Intervention type                  | Disease of care receiver | Health outcomes of caregiver                                             | Review type and synthesis method                                            | Quantitative, qualitative, or mixed-methods |
|---------------------------|---------------------------------------------------------------------------------------------------------------------------|--------------|----------------------------------------------------------------------------------------------------------------------------------------------------------------------------------------------------------|-------------------------------|-------------------------------------------|------------------------------------|------------------------------------|--------------------------|--------------------------------------------------------------------------|-----------------------------------------------------------------------------|---------------------------------------------|
| Shaw, 2009 <sup>36</sup>  | UK, US, Canada, Australia, New Zealand, Germany, Japan                                                                    | Any          | Medline, amed, assia, ibss, bni, cochrane library, dare, hta database, nhs economic evaluation database, cinahl, crisp, econlit, embase, hmic, nrr, psycinfo, scopus, social care online, web of science | 2008                          | 174                                       | NA                                 | Respite                            | Frailty                  | Depression, anxiety                                                      | Systematic review with meta-analysis, meta-synthesis of qualitative studies | Mixed methods                               |
| Shim, 2020 <sup>37</sup>  | NA                                                                                                                        | RCTs         | Pubmed, psycinfo, scopus, cinahl, embase                                                                                                                                                                 | Feb-2020                      | 9                                         | 14-120 caregivers                  | Mindfulness                        | Dementia                 | Cognitive tests, depression, mindfulness, anxiety, biomarkers for stress | Systematic review                                                           | Quantitative                                |
| Sin, 2018 <sup>38</sup>   | UK, Australia, US, Hong-Kong, Canada, Sweden, Norway, Netherlands, France, Spain, Denmark, Poland, Germany, Italy, Greece | Any          | Medline, psycinfo, cinahl, embase, web of science, assia, central, hta database, dare, eed                                                                                                               | Dec-2016                      | 81                                        | 4537 caregivers                    | Psychosocial, Education and skills | Any                      | Depression, anxiety, distress, HR-QoL                                    | Systematic review                                                           | Mixed methods                               |
| Smith, 2014 <sup>39</sup> | US, UK, Canada                                                                                                            | Any          | Medline, embase, psycinfo, social policy and practice, cinahl plus, allied and complementary medicine, social sciences citation index, scopus                                                            | Jan-2013                      | 2                                         | NA                                 | Psychosocial, Education and skills | Dementia, stroke         | NA                                                                       | Systematic review                                                           | Qualitative                                 |

| Author, year                   | Countries of primary studies                                                        | Study design                | Databases searched                                                                                                                              | End date of literature search | # studies included in the umbrella review | # participants, mean age, % female                    | Intervention type                  | Disease of care receiver | Health outcomes of caregiver                                            | Review type and synthesis method     | Quantitative, qualitative, or mixed-methods |
|--------------------------------|-------------------------------------------------------------------------------------|-----------------------------|-------------------------------------------------------------------------------------------------------------------------------------------------|-------------------------------|-------------------------------------------|-------------------------------------------------------|------------------------------------|--------------------------|-------------------------------------------------------------------------|--------------------------------------|---------------------------------------------|
| Smith, 2019 <sup>40</sup>      | US, UK, Australia, Sweden, Canada, Ireland, Germany, India, Spain, Taiwan, Thailand | RCTs and quasi-experimental | Embase, medline, cinahl, pubmed, world health organization international clinical trial registry platform registry, clinicaltrials.gov registry | Mar-2019                      | 23                                        | NA                                                    | Education and skills               | Stroke, frailty          | HR-QoL, depression, anxiety                                             | Systematic review with meta-analysis | Quantitative                                |
| Teahan, 2020 <sup>41</sup>     | US, China, Spain, the Netherlands, Taiwan, UK, Peru, Russia, India                  | RCTs                        | Cochrane, pubmed, cinahl, psycinfo, embase, assia                                                                                               | Mar-2016                      | 24                                        | NA                                                    | Psychosocial, Education and skills | Dementia                 | Depression, HR-QoL, general health                                      | Systematic review with meta-analysis | Quantitative                                |
| Treanor, 2019 <sup>42</sup>    | US, UK, Denmark, Canada, Netherlands, Australia                                     | RCTs and quasi-experimental | Cochrane central, medline, embase, psycinfo, proquest, open single, web of science                                                              | Dec-2018                      | 19                                        | 1967 caregivers                                       | Psychosocial, Education and skills | Cancer                   | HR-QoL, depression, anxiety, emotional distress, physical health status | Systematic review with meta-analysis | Quantitative                                |
| Vandepitte, 2016 <sup>43</sup> | Canada, US, Germany, Italy                                                          | RCTs and quasi-experimental | Pubmed, web of science                                                                                                                          | Mar-2015                      | 5                                         | NA                                                    | Respite                            | Dementia                 | Depression, anxiety                                                     | Systematic review                    | Quantitative                                |
| Waldron, 2013 <sup>44</sup>    | N.A.                                                                                | RCTs                        | Medline, psycinfo, embase, cinahl, pubmed, cochrane library                                                                                     | Nov-2010                      | 6                                         | 1115 caregivers, mean age 56.5 (SD=3.3), 81.9% female | Psychosocial                       | Cancer                   | HR-QoL                                                                  | Systematic review                    | Quantitative                                |
| Wang, 2020 <sup>45</sup>       | US, the Netherlands, France                                                         | RCTs and quasi-experimental | Cinahl, scopus, embase, medline, psycinfo, web of science, world health organization international clinical trials registry platform            | Jul-2019                      | 8                                         | NA                                                    | Psychosocial                       | Dementia                 | Depression, anxiety                                                     | Systematic review with meta-analysis | Quantitative                                |
| Wiegelmann, 2021 <sup>46</sup> | US, UK, Germany, China                                                              | RCTs                        | Pubmed, psycinfo, scopus, cinahl                                                                                                                | Aug-2018                      | 37                                        | NA                                                    | Psychosocial, Education and skills | Dementia                 | HR-QoL, depression                                                      | Systematic review                    | Quantitative                                |

| Author, year               | Countries of primary studies    | Study design | Databases searched                                                                                              | End date of literature search | # studies included in the umbrella review | # participants, mean age, % female | Intervention type | Disease of care receiver | Health outcomes of caregiver        | Review type and synthesis method     | Quantitative, qualitative, or mixed-methods |
|----------------------------|---------------------------------|--------------|-----------------------------------------------------------------------------------------------------------------|-------------------------------|-------------------------------------------|------------------------------------|-------------------|--------------------------|-------------------------------------|--------------------------------------|---------------------------------------------|
| Zabihi, 2020 <sup>47</sup> | Hong Kong, US, Spain, Australia | RCTs         | Medline, embase, psycinfo, cinahl, central and online trial registers for randomised controlled clinical trials | Dec-2018                      | 14                                        | NA                                 | Psychosocial      | Dementia                 | Depression (symptoms and diagnosis) | Systematic review with meta-analysis | Quantitative                                |

Abbreviations: RCT, Randomized Controlled Trial; QoL, quality of life; HR-QoL, Health-Related Quality of Life.

**Full references of all included reviews (n=47)**

1. Akarsu NE, Prince MJ, Lawrence VC, Das-Munshi J. Depression in carers of people with dementia from a minority ethnic background: Systematic review and meta-analysis of randomised controlled trials of psychosocial interventions. *Int J Geriatr Psychiatry*. 2019;34(6):790-806. doi:10.1002/gps.5070
2. Al Daken LI, Ahmad MM. The implementation of mindfulness-based interventions and educational interventions to support family caregivers of patients with cancer: A systematic review. *Perspect Psychiatr Care*. 2018;54(3 PG-441-452):441-452. doi:https://dx.doi.org/10.1111/ppc.12286
3. Bennett S, Laver K, Voigt-Radloff S, et al. Occupational therapy for people with dementia and their family carers provided at home: a systematic review and meta-analysis. *BMJ Open*. 2019;9(11 PG-e026308):e026308. doi:https://dx.doi.org/10.1136/bmjopen-2018-026308
4. Boots LM, de Vugt ME, van Knippenberg RJ, Kempen GI, Verhey FR. A systematic review of Internet-based supportive interventions for caregivers of patients with dementia. *Int J Geriatr Psychiatry*. 2014;29(4 PG-331-344):331-344. doi:https://dx.doi.org/10.1002/gps.4016
5. Bourne P, Camic PM, Crutch SJ. Psychosocial outcomes of dyadic arts interventions for people with a dementia and their informal caregivers: A systematic review. *Heal Soc Care Community*. 2021;29(6):1632-1649. doi:10.1111/hsc.13267
6. Bunn F, Goodman C, Pinkney E, Drennan VM. Specialist nursing and community support for the carers of people with dementia living at home: a evidence synthesis. *Heal Soc Care Community*. 2016;24(1):48-67. doi:10.1111/hsc.12189
7. Cheng ST, Li KK, Losada A, et al. The effectiveness of nonpharmacological interventions for informal dementia caregivers: An updated systematic review and meta-analysis. *Psychol Aging*. 2020;35(1 PG-55-77):55-77. doi:https://dx.doi.org/10.1037/pag0000401
8. Corry M, Neenan K, Brabyn S, Sheaf G, Smith V. Telephone interventions, delivered by healthcare professionals, for providing education and psychosocial support for informal caregivers of adults with diagnosed illnesses. *Cochrane Database Syst Rev*. 2019;5(PG-CD012533):CD012533. doi:https://dx.doi.org/10.1002/14651858.CD012533.pub2
9. Cuthbert CA, King-Shier K, Ruether D, Tapp DM, Culos-Reed SN. What is the state of the science on physical activity interventions for family caregivers? A systematic review and RE-AIM evaluation. *J Phys Act Heal*. 2017;14(7):578-595. doi:10.1123/jpah.2016-0280
10. Dam AE, de Vugt ME, Klinkenberg IP, Verhey FR, van Boxtel MP. A systematic review of social support interventions for caregivers of people with dementia: Are they doing what they promise? *Maturitas*. 2016;85(PG-117-130):117-130. doi:https://dx.doi.org/10.1016/j.maturitas.2015.12.008
11. Doyle KL, Toepfer M, Bradfield AF, et al. Systematic review of exercise for caregiver-care recipient dyads: What is best for spousal caregivers - Exercising together or not at all? *Gerontologist*. 2021;61(6):E283-E301. doi:10.1093/geront/gnaa043
12. Du Preez J, Millsteed J, Marquis R, Richmond J. The Role of Adult Day Services in Supporting the Occupational Participation of People with Dementia and Their Carers: An Integrative Review. *Healthcare*. 2018;6(2 PG-08):8. doi:https://dx.doi.org/10.3390/healthcare6020043
13. Forster A, Brown L, Smith J, et al. Information provision for stroke patients and their caregivers. *Cochrane Database Syst Rev*. Published online November 14, 2012. doi:10.1002/14651858.cd001919.pub3
14. Gabriel I, Creedy D, Coyne E. A systematic review of psychosocial interventions to improve quality of life of people with cancer and their family caregivers. *Nurs Open*. 2020;7(5):1299-1312. doi:10.1002/nop2.543
15. Goeman D, Renahan E, Koch S. What is the effectiveness of the support worker role for people with dementia and their carers? A systematic review. *BMC Health Serv Res*. 2016;16(1). doi:10.1186/s12913-016-1531-2
16. González-Fraile E, Ballesteros J, Rueda JR, Santos-Zorrozúa B, Solà I, McCleery J. Remotely delivered information, training and support for informal caregivers of people with dementia. *Cochrane Database Syst Rev*. 2021;2021(1). doi:10.1002/14651858.CD006440.pub3
17. Greenwood N, Pelone F, Hassenkamp AM. General practice based psychosocial interventions for supporting carers of people with dementia or stroke: a systematic review. *BMC Fam Pract*. 2016;17(PG-3):3. doi:https://dx.doi.org/10.1186/s12875-015-0399-2
18. Li G, Yuan H, Zhang W. The Effects of Mindfulness-Based Stress Reduction for Family Caregivers: Systematic Review. *Arch Psychiatr Nurs*. 2016;30(2):292-299. doi:10.1016/j.apnu.2015.08.014
19. Heckel L, Heynsbergh NL, Livingston PM. Are cancer helplines effective in supporting caregivers? A systematic review. *Support Care Cancer*. 2019;27(9):3219-3231. doi:10.1007/s00520-019-04807-z
20. Hopkinson MD, Reavell J, Lane DA, Mallikarjun P. Cognitive Behavioral Therapy for Depression, Anxiety, and Stress in Caregivers of Dementia Patients: A Systematic Review and Meta-Analysis. *Gerontologist*. 2019;59(4 PG-343-362):e343-e362. doi:https://dx.doi.org/10.1093/geront/gnx217
21. Hopwood J, Walker N, McDonagh L, et al. Internet-Based Interventions Aimed at Supporting Family Caregivers of People With Dementia: Systematic Review. *J Med Internet Res*. 2018;20(6 PG-e216):e216. doi:https://dx.doi.org/10.2196/jmir.9548
22. Yoon Irons J, Garip G, Cross AJ, Sheffield D, Bird J. An integrative systematic review of creative arts interventions for older informal caregivers of people with neurological conditions. *PLoS One*. 2020;15(12 December). doi:10.1371/journal.pone.0243461
23. Lee M, Ryoo JH, Crowder J, Byon HD, Williams IC. A systematic review and meta-analysis on effective interventions for health-related quality of life among caregivers of people with dementia. *J Adv Nurs*. 2020;76(2 PG-475-489):475-489. doi:https://dx.doi.org/10.1111/jan.14262
24. Lins S, Hayder-Beichel D, Rucker G, et al. Efficacy and experiences of telephone counselling for informal carers of people with dementia. *Cochrane Database Syst Rev*. 2014;9 PG-CD009126):CD009126.

- doi:https://dx.doi.org/10.1002/14651858.CD009126.pub2
25. Liu Z, Chen Q lin, Sun Y ying. Mindfulness training for psychological stress in family caregivers of persons with dementia: A systematic review and meta-analysis of randomized controlled trials. *Clin Interv Aging*. 2017;12:1521-1529. doi:10.2147/CIA.S146213
  26. Lucero RJ, Fehlberg EA, Patel AGM, et al. The effects of information and communication technologies on informal caregivers of persons living with dementia: A systematic review. *Alzheimer's Dement Transl Res Clin Interv*. 2019;5:1-12. doi:10.1016/j.trci.2018.11.003
  27. Maayan N, Soares-Weiser K, Lee H. Respite care for people with dementia and their carers. *Cochrane Database Syst Rev*. 2014;2014(1). doi:10.1002/14651858.CD004396.pub3
  28. Maffioletti VLR, Baptista MAT, Santos RL, Rodrigues VM, Dourado MCN. Effectiveness of day care in supporting family caregivers of people with dementia: A systematic review. *Dement Neuropsychol*. 2019;13(3 PG-268-283):268-283. doi:https://dx.doi.org/10.1590/1980-57642018dn13-030003
  29. Miles L, McCausland BMS, Patel HP, Amin J, Osman-Hicks VC. A systematic review of the provision and efficacy of patient and carer information and support (PCIS) interventions for patients with dementia and their informal carers. *Aging Clin Exp Res*. 2020;32(12):2439-2448. doi:10.1007/s40520-019-01428-8
  30. Minshall C, Pascoe MC, Thompson DR, et al. Psychosocial interventions for stroke survivors, carers and survivor-carer dyads: a systematic review and meta-analysis. *Top Stroke Rehabil*. 2019;26(7 PG-554-564):554-564. doi:https://dx.doi.org/10.1080/10749357.2019.1625173
  31. Parkinson B, Lawrence M, McElhinney E, Booth J. Mindfulness for people with long-term conditions and their family caregivers: A systematic review. *Complement Ther Clin Pract*. 2019;34:76-86. doi:10.1016/j.ctcp.2018.10.019
  32. Piersol CV, Canton K, Connor SE, Giller I, Lipman S, Sager S. Effectiveness of Interventions for Caregivers of People With Alzheimer's Disease and Related Major Neurocognitive Disorders: A Systematic Review. *Am J Occup Ther*. 2017;71(5):p1-7105180020. doi:10.5014/ajot.2017.027581
  33. Pritchard E, Cussen A, Delafosse V, Swift M, Jolliffe L, Yeates H. Interventions supporting caregiver readiness when caring for patients with dementia following discharge home: A mixed-methods systematic review. *Australas J Ageing*. 2020;39(3 PG-239-250):e239-e250. doi:https://dx.doi.org/10.1111/ajag.12765
  34. Pucciarelli G, Lommi M, Magwood GS, et al. Effectiveness of dyadic interventions to improve stroke patient-caregiver dyads' outcomes after discharge: A systematic review and meta-analysis study. *Eur J Cardiovasc Nurs*. 2021;20(1):14-33. doi:10.1177/1474515120926069
  35. Reilly S, Miranda-Castillo C, Malouf R, et al. Case management approaches to home support for people with dementia. *Cochrane Database Syst Rev*. 2015;2017(6). doi:10.1002/14651858.CD008345.pub2
  36. Shaw C, McNamara R, Abrams K, et al. Systematic review of respite care in the frail elderly. *Health Technol Assess*. 2009;13(20 PG-1-224, iii):1-224, iii. doi:https://dx.doi.org/10.3310/hta13200
  37. Shim M, Tilley JL, Im S, Price K, Gonzalez A. A Systematic Review of Mindfulness-Based Interventions for Patients with Mild Cognitive Impairment or Dementia and Caregivers. *J Geriatr Psychiatry Neurol*. 2021;34(6):528-554. doi:10.1177/0891988720957104
  38. Sin J, Henderson C, Spain D, Cornelius V, Chen T, Gillard S. eHealth interventions for family carers of people with long term illness: A promising approach? *Clin Psychol Rev*. 2018;60:109-125. doi:10.1016/j.cpr.2018.01.008
  39. Smith R, Greenwood N. The impact of volunteer mentoring schemes on carers of people with dementia and volunteer mentors: a systematic review. *Am J Alzheimer's Dis Other Dementias*. 2014;29(1 PG-8-17):8-17. doi:https://dx.doi.org/10.1177/1533317513505135
  40. Smith TO, Pearson M, Pfeiffer K, Crotty M, Lamb SE. Caregiver Interventions for Adults Discharged from the Hospital: Systematic Review and Meta-Analysis. *J Am Geriatr Soc*. 2019;67(9):1960-1969. doi:10.1111/jgs.16048
  41. Teahan Á, Lafferty A, McAuliffe E, et al. Psychosocial Interventions for Family Carers of People With Dementia: A Systematic Review and Meta-Analysis. *J Aging Health*. 2020;32(9):1198-1213. doi:10.1177/0898264319899793
  42. Treanor CJ, Santin O, Prue G, et al. Psychosocial interventions for informal caregivers of people living with cancer. *Cochrane Database Syst Rev*. 2019;2019(6). doi:10.1002/14651858.CD009912.pub2
  43. Vandepitte S, Van Den Noortgate N, Putman K, Verhaeghe S, Verdonck C, Annemans L. Effectiveness of respite care in supporting informal caregivers of persons with dementia: a systematic review. *Int J Geriatr Psychiatry*. 2016;31(12):1277-1288. doi:10.1002/gps.4504
  44. Waldron EA, Janke EA, Bechtel CF, Ramirez M, Cohen A. A systematic review of psychosocial interventions to improve cancer caregiver quality of life. *Psychooncology*. 2013;22(6 PG-1200-1207):1200-1207. doi:https://dx.doi.org/10.1002/pon.3118
  45. Wang S, Bressington DT, Leung AYM, Davidson PM, Cheung DSK. The effects of bibliotherapy on the mental well-being of informal caregivers of people with neurocognitive disorder: A systematic review and meta-analysis. *Int J Nurs Stud*. 2020;109. doi:10.1016/j.ijnurstu.2020.103643
  46. Wiegmann H, Speller S, Verhaert LM, Schirra-Weirich L, Wolf-Ostermann K. Psychosocial interventions to support the mental health of informal caregivers of persons living with dementia - a systematic literature review. *BMC Geriatr*. 2021;21(1 PG-94):94. doi:https://dx.doi.org/10.1186/s12877-021-02020-4
  47. Zabih S, Lemmel FK, Orgeta V. Behavioural Activation for Depression in Informal Caregivers: A Systematic Review and Meta-Analysis of Randomised Controlled Clinical Trials. *J Affect Disord*. 2020;274(PG-1173-1183):1173-1183. doi:10.1016/j.jad.2020.03.124

**Supplementary Table 7. Summary of findings for interventions involving case management**

| First author, year | Summary of findings on effectiveness                                                                                                                                                  |
|--------------------|---------------------------------------------------------------------------------------------------------------------------------------------------------------------------------------|
| Goeman, 2016       | Inconclusive findings with similar number of studies reporting either positive effects or no effects.                                                                                 |
| Greenwood, 2016    | No significant effect.                                                                                                                                                                |
| Hopwood, 2018      | No significant effect. However, some multicomponent interventions in this review show promise for reducing caregivers' depressive symptoms and anxiety.                               |
| Lee, 2020          | No significant effect: Hedges G was 0.135 (95% CI=-0.076, 0.346, $p=0.210$ ). However, multicomponent interventions were effective: Hedges G 0.255 (95% CI=0.054, 0.457, $p=0.013$ ). |
| Lucero, 2019       | Telephone-based intervention showed significant decrease in depression.                                                                                                               |
| Piersol, 2017      | No significant effect.                                                                                                                                                                |
| Reilly, 2015       | Significant reduction in depression and short-term health (MD=-0.08, 95% CI=-0.16, -0.01, $n=2888$ , $p=0.03$ ), but no effect on longer follow-ups.                                  |
| Pucciareli, 2020   | No significant effect: SMD=-0.19, 95% CI=-0.40, 0.00, $p=0.05$ .                                                                                                                      |

Abbreviations: CI, confidence interval; SMD, standardized mean difference; MD, mean difference.

**Supplementary Table 8. Summary of findings for psychosocial, psychoeducational, and skills-building interventions**

| First author, year                                                                  | Summary of findings on effectiveness                                                                                                                                                                                                                                                                                                                                                                                                                                                                                                                                                                                             |
|-------------------------------------------------------------------------------------|----------------------------------------------------------------------------------------------------------------------------------------------------------------------------------------------------------------------------------------------------------------------------------------------------------------------------------------------------------------------------------------------------------------------------------------------------------------------------------------------------------------------------------------------------------------------------------------------------------------------------------|
| <b>Reviews that included both psychosocial and educational interventions (n=19)</b> |                                                                                                                                                                                                                                                                                                                                                                                                                                                                                                                                                                                                                                  |
| Akarsu, 2019                                                                        | In random effects MA, interventions (psychological, multicomponent, and educational) to address depression in ethnic minority caregivers relative to the control condition were associated with an overall mean reduction in depression scores (SMD=-0.17, 95% CI=-0.29, -0.05, $p=0.005$ ). Heterogeneity was negligible ( $I^2=0.0\%$ , $p=0.547$ ).                                                                                                                                                                                                                                                                           |
| Gonzalez-Fraile, 2021                                                               | Remotely delivered interventions involving training, support, or both (with or without information) do not affect caregiver depressive symptoms (SMD=-0.05, 95% CI=-0.22, 0.12, $I^2=9\%$ ) or caregiver HR-QoL (SMD=0.10, 95% CI=-0.13, 0.32, $I^2=0\%$ ). However, these interventions may result in a slight improvement in caregiver depressive symptoms (SMD=-0.25, 95% CI=-0.43, -0.06, $I^2=53\%$ ) compared to a control condition of information alone. Interventions may result in little or no difference in caregiver HR-QoL when compared with information alone (SMD=-0.03, 95% CI=-0.28, 0.21, $I^2=0\%$ ).       |
| Greenwood, 2016                                                                     | One study reported no significant effects in the proportion of caregivers with scores of CES-D $\geq 16$ (i.e., at risk of depression) between the intervention and control groups. Another study reported significant positive changes over time ( $p=0.009$ ) for improving depression scores.                                                                                                                                                                                                                                                                                                                                 |
| Hopwood, 2018                                                                       | Overall, studies assessing psychological support suggested a positive effect on a variety of factors, including improving caregiver distress, depression, anxiety, and strain. Some multiple-component interventions showed promise in reducing stress, anxiety, and depressive symptoms for family caregivers and in increasing self-efficacy.                                                                                                                                                                                                                                                                                  |
| Lee, 2020                                                                           | CBT was effective, Hedges $G=0.767$ (95% CI=0.142, 1.391, $p=0.016$ ); Psychoeducation was not effective, Hedges $G=0.163$ (95% CI=-0.001, 0.328, $p=0.052$ ); Social support and cognitive rehabilitation were not effective, $G=0.231$ (95% CI=-0.104, 0.567, $p=0.176$ and $G=0.010$ (95% CI=-0.208, 0.229, $p=0.926$ ), respectively. However, multicomponent interventions were effective: Hedges $G=0.255$ (95% CI=0.054, 0.457, $p=0.013$ ).                                                                                                                                                                              |
| Lins, 2014                                                                          | Without educational material and workbook: significant pooled difference in depressive symptoms between the telephone counselling group and the control group (SMD=0.32, 95% CI=0.01, 0.63, $p=0.04$ ). With educational material and workbook: reduction of depressive symptoms in the intervention group and an increase in the control group after months: -4.1% points in the intervention group (from 7.20% to 3.10%) and 0.56% points in the control group (from 7.44% to 8%). The difference between the groups was statistically significant ( $p=0.01$ ).                                                               |
| Piersol, 2017                                                                       | Communication skills training: increased QoL and well-being; Coaching: reduced stress and depression; Psychoeducation: improved QoL, well-being, reduced depression; Group interventions: strong evidence indicates that in person caregiver support groups led by professionals improved caregiver well-being and reduced depression; CBT: compelling evidence that interventions focused on cognitive reframing and skills training reduced caregiver depression and anxiety.                                                                                                                                                  |
| Teahan, 2020                                                                        | Interventions were shown to have a significant effect ( $p=0.002$ ) on caregivers' depression levels pre- and postintervention (SMD=-0.36, 95% CI=-0.60, -0.13, 11 trials, $N=1856$ participants). The interventions were shown to have a significantly small to moderate effect size ( $p<0.01$ ) on the general health scores of caregivers pre- and postintervention (SMD=0.34, 95% CI=0.18, 0.51, 7 trials, $N=1503$ participants). Although the overall effect on QoL was not statistically significant ( $p=0.12$ ), there was a trend in favor of intervention (SMD=0.63, 95% CI=-0.16, 1.43, 3 interventions, $N=201$ ). |
| Wiegelmann, 2021                                                                    | 4 out of 11 psychoeducational interventions described positive results, while 7 reported no significant effect. 1 out of 4 counselling interventions reported improvement in depression. 4 out of six CBT interventions reported positive effects. 3 out of 8 psychoeducational interventions reported improvement in QoL. 1 out of 6 counselling interventions improved QoL. 1 CBT intervention measuring QoL failed to report significant effects. Neither of the 2 befriending interventions reported positive changes in QoL.                                                                                                |
| Zabihi, 2020                                                                        | MA of effects of behavioral activation showed that results significantly favored intervention in reducing caregiver depressive symptoms at post-treatment (8 studies, 815 participants, SMD=-0.68, 95% CI=-1.14,                                                                                                                                                                                                                                                                                                                                                                                                                 |

|                                                                                              |                                                                                                                                                                                                                                                                                                                                                                                                                                                                                                                                                                                                                                                                                                                                                                                                                                                                                                                                                                                                                                        |
|----------------------------------------------------------------------------------------------|----------------------------------------------------------------------------------------------------------------------------------------------------------------------------------------------------------------------------------------------------------------------------------------------------------------------------------------------------------------------------------------------------------------------------------------------------------------------------------------------------------------------------------------------------------------------------------------------------------------------------------------------------------------------------------------------------------------------------------------------------------------------------------------------------------------------------------------------------------------------------------------------------------------------------------------------------------------------------------------------------------------------------------------|
|                                                                                              | -0.22). There was high heterogeneity between studies ( $I^2=89\%$ ). Long-term effects were also favorable (2 studies, 235 participants, $SMD=-0.99$ , 95% $CI=-1.26$ , $-0.71$ , $I^2=92\%$ ). Behavioral activation was also associated with decreased risk of depression diagnosis (3 studies, 854 participants, $OR=0.35$ , 95% $CI=0.19$ , $0.67$ , efficacy at 3-12 months) and was superior to psychoeducation in one study.                                                                                                                                                                                                                                                                                                                                                                                                                                                                                                                                                                                                    |
| Gabriel, 2020                                                                                | All 12 studies assessed psychological/emotional well-being; 4 studies report statistically significant improvement for dyads, 2 studies report significant improvement for caregivers. Remaining 6 studies report no significant change. As for physical well-being, all 12 studies assessed it; 5 report significant improvement for dyads, while 1 reports it for care receivers only, 6 report no change.                                                                                                                                                                                                                                                                                                                                                                                                                                                                                                                                                                                                                           |
| Heckel, 2019                                                                                 | No significant effect on depression (1 study), another study showed positive effects for reducing emotional distress.                                                                                                                                                                                                                                                                                                                                                                                                                                                                                                                                                                                                                                                                                                                                                                                                                                                                                                                  |
| Treanor, 2019                                                                                | Considering the pooled and unpooled findings, psychosocial interventions may improve slightly QoL immediately post-intervention, but this benefit may not be maintained in the longer term (6-2 months later). Pooled and unpooled findings indicated that psychosocial interventions probably have little to no effect on depression, anxiety or emotional distress for caregivers. Evidence for physical outcomes is insufficient.                                                                                                                                                                                                                                                                                                                                                                                                                                                                                                                                                                                                   |
| Waldron, 2013                                                                                | Nil to small effects on QoL outcomes were found in the 4 studies where QoL effect sizes could be calculated, and 2 of these reported significant changes in QoL.                                                                                                                                                                                                                                                                                                                                                                                                                                                                                                                                                                                                                                                                                                                                                                                                                                                                       |
| Corry, 2019                                                                                  | There is little or no difference between telephone support interventions and usual care for QoL at the end of intervention ( $SMD=-0.02$ , 95% $CI=-0.24$ , $0.19$ , 4 studies, 364 caregivers) and at short-term follow-up (3 months) ( $SMD=0.00$ , 95% $CI=-4.43$ , $4.43$ , 1 study, 128 caregivers). The effects of telephone interventions on depression at the end of intervention were uncertain ( $SMD=-0.37$ , 95% $CI=-0.70$ , $-0.05$ , 9 studies, 792 caregivers). Telephone interventions may have little or no effect at medium-term follow-up (3-6 months) ( $SMD=-0.05$ , 95% $CI=-0.56$ , $0.45$ , 3 studies, 227 caregivers). Telephone interventions compared with usual care may slightly decrease anxiety levels at the end of intervention and short-term follow-up (2 studies, no MA). Telephone support interventions, when compared to usual care may have little or no effect on caregiver physical health at the end of intervention ( $SMD=-0.09$ , 95% $CI=-0.35$ , $0.17$ , 2 studies, 248 caregivers). |
| Sin, 2018                                                                                    | Of those studies that assessed effectiveness of interventions, 44% reported equivocal findings (no effect), 12% saw negative effects (control group more favorable than intervention) and only 32% reported positive effects. While caregivers reported positive experiences in using the interventions (as per qualitative findings), no significant changes in their objective outcomes were identified.                                                                                                                                                                                                                                                                                                                                                                                                                                                                                                                                                                                                                             |
| Forster, 2012                                                                                | Out of 3 RCTs measuring depression, 2 showed no significant effect, while 1 reported less depression in the intervention group. Out of 4 RCTs measuring QoL, 3 report no effects, while 1 reported higher QoL in the intervention group.                                                                                                                                                                                                                                                                                                                                                                                                                                                                                                                                                                                                                                                                                                                                                                                               |
| Minshall, 2019                                                                               | Based on MA of 6 RCTs measuring depression, the effect is insignificant (pooled effect size= $-0.20$ , 95% $CI$ $-0.40$ , $0.00$ , $n=279$ in intervention group, $n=282$ in control group). One trial reported improvements in caregiver QoL.                                                                                                                                                                                                                                                                                                                                                                                                                                                                                                                                                                                                                                                                                                                                                                                         |
| Pucciarelli, 2020                                                                            | Caregivers who received an educational intervention were found to have lower depression levels than those in the control group, although no significant differences were observed between these two groups ( $SMD=-0.19$ , 95% $CI=-0.40$ , $0.00$ , $p=0.05$ ).                                                                                                                                                                                                                                                                                                                                                                                                                                                                                                                                                                                                                                                                                                                                                                       |
| <b>Reviews that included only psychosocial (n=2) or only educational (n=2) interventions</b> |                                                                                                                                                                                                                                                                                                                                                                                                                                                                                                                                                                                                                                                                                                                                                                                                                                                                                                                                                                                                                                        |
| Bennett, 2019 (occupational therapy)                                                         | Data from six studies that measured the emotional distress family caregivers felt were combined, and demonstrated a small, statistically significant result in favor of those receiving occupational therapy ( $SMD=-0.23$ , 95% $CI=-0.42$ , $-0.05$ , $I^2=41\%$ ). Only 3 studies measured overall QoL of the caregivers of people with dementia. Pooled data from 2 of these studies produced a large, significant between-group difference after the intervention ( $SMD=0.99$ , 95% $CI=0.66$ , $1.33$ , $I^2=2\%$ ).                                                                                                                                                                                                                                                                                                                                                                                                                                                                                                            |
| Smith, 2019 (training)                                                                       | There was no benefit on caregiver HR-QoL compared with the control group at 3-6 months ( $SMD=0.20$ ; 95% $CI=-1.12$ , $1.52$ , $N=638$ , $I^2=98\%$ ) or 12 months ( $SMD=0.46$ , 95% $CI=-0.34$ , $1.27$ , $N=415$ , $I^2=94\%$ ). There was no benefit from the caregiver intervention on caregiver depression compared with the control group at 3 to 6 months ( $SMD=0.03$ , 95% $CI=-0.08$ , $0.14$ , $N=1239$ , $I^2=0\%$ ) or 12 months ( $SMD=-0.71$ , 95% $CI=-2.23$ , $0.81$ , $N=613$ , $I^2=99\%$ ). For anxiety, 1                                                                                                                                                                                                                                                                                                                                                                                                                                                                                                       |

|                                |                                                                                                                                                                                                                                                                                                                                                                                                                                                                                                                                                                                              |
|--------------------------------|----------------------------------------------------------------------------------------------------------------------------------------------------------------------------------------------------------------------------------------------------------------------------------------------------------------------------------------------------------------------------------------------------------------------------------------------------------------------------------------------------------------------------------------------------------------------------------------------|
|                                | study reported significant effect, while another reported no improvement.                                                                                                                                                                                                                                                                                                                                                                                                                                                                                                                    |
| Hopkinson, 2019 (psychosocial) | Caregivers receiving CBT demonstrated statistically significant reductions in depression (n=12; 995 participants; SMD=-0.34; 95% CI=-0.47, -0.21, $p<0.001$ relative to comparator groups immediately after the intervention endpoint and in 3 months (n=3; SMD=-0.99, 95% CI=-1.35, -0.64, $p<0.001$ ). There was no significant difference in caregiver anxiety (n=10, 829 participants, SMD=0.10; 95% CI=-0.18, 0.39, $p=0.47$ ).                                                                                                                                                         |
| Wang, 2020 (psychosocial)      | For depression, the overall effect for the 2 types of bibliotherapy was significant at $Z=1.99$ (random effect model, SMD=-0.74, 95% CI=-1.47, -0.01, $p=0.05$ ). However, when considered separately, only the video based bibliotherapy significantly reduced depression at $Z=2.78$ (random effect model, SMD=-2.11, 95% CI=-3.6, -0.62, $p=0.005$ ). For anxiety, the heterogeneity of the 3 studies included in MA was low ( $I^2=22\%$ ), the overall effect of bibliotherapy on anxiety was significant at $Z=2.30$ , $p=0.02$ (random effect model, SMD=-0.22, 95% CI=-0.41, -0.33). |

Abbreviations: RCT, randomized controlled trial; CI, confidence interval; SMD, standardized mean difference; CBT, cognitive behavioral therapy; QoL, quality of life; HR-QoL, health-related quality of life; MA, meta-analysis.

**Supplementary Table 9. Summary of findings for interventions involving respite care**

| <b>First author, year</b> | <b>Summary of findings on effectiveness</b>                                                                                                                                                                                                                                                                                                                                                                                                                                                                                                        |
|---------------------------|----------------------------------------------------------------------------------------------------------------------------------------------------------------------------------------------------------------------------------------------------------------------------------------------------------------------------------------------------------------------------------------------------------------------------------------------------------------------------------------------------------------------------------------------------|
| Maayan, 2019              | Analysis of the available data showed no significant effects on caregiver outcomes when respite care was compared with no respite care in 3 studies.                                                                                                                                                                                                                                                                                                                                                                                               |
| Maffioletti, 2019         | 5 studies reported positive effects on depression, 3 on psychological/psycho-somatic complaints, and 4 studies also report improved health status and greater psychological well-being. 2 studies report no changes in caregiver outcomes.                                                                                                                                                                                                                                                                                                         |
| Vandepitte, 2016          | Reported benefits of day care provision for caregivers were small and mixed (33% were effective). The only included in-home respite care program indicated some beneficial effects for caregivers.                                                                                                                                                                                                                                                                                                                                                 |
| Shaw, 2009                | MA showed insignificant positive effect in favor of respite care at short term, but no effect in long term. Evidence from narratively reviewed studies indicated that respite does not have a significant impact on psychological well-being or depression when compared with normal care. Few studies (with lower quality of design, not in MA) reported decrease in depression, but at short follow-up times. MA of randomized/quasi-experimental studies measuring caregiver anxiety as an outcome did not demonstrate any significant effects. |

Abbreviations: MA, meta-analysis.

**Supplementary Table 10. Summary of findings for interventions involving relaxation, physical activity, or leisure**

| First author, year                                                                                                                                                   | Summary of findings on effectiveness                                                                                                                                                                                                                                                                                                                                                                                                                                                                                                                                                                                                                                                                                                            |
|----------------------------------------------------------------------------------------------------------------------------------------------------------------------|-------------------------------------------------------------------------------------------------------------------------------------------------------------------------------------------------------------------------------------------------------------------------------------------------------------------------------------------------------------------------------------------------------------------------------------------------------------------------------------------------------------------------------------------------------------------------------------------------------------------------------------------------------------------------------------------------------------------------------------------------|
| Cheng, 2020                                                                                                                                                          | Miscellaneous interventions were shown to reduce stress and depressive symptoms. For this group of interventions, Hedges G=-0.49, n=12, N=758. Interestingly, in this review, multicomponent and miscellaneous interventions had the largest effects.                                                                                                                                                                                                                                                                                                                                                                                                                                                                                           |
| Lee, 2020                                                                                                                                                            | MA of the 2 studies showed that the Hedges G was 0.576 (95% CI=0.035, 1.118, $p=0.037$ ), indicating that there was a statistically significant difference between the control group and the intervention group on improving caregiver HR-QoL.                                                                                                                                                                                                                                                                                                                                                                                                                                                                                                  |
| Piersol, 2017                                                                                                                                                        | Exercise programs showed improved caregiver physical health and decreased stress. Adapted leisure programs showed improved well-being.                                                                                                                                                                                                                                                                                                                                                                                                                                                                                                                                                                                                          |
| Irons, 2020                                                                                                                                                          | For outcomes of interest, pre-post effect sizes revealed some benefits of the intervention: large effect sizes were detected for singing on well-being (Cohen's $d=1.04$ ), and positive-negative mood (Cohen's $d=1.29$ ); and for music making on relaxation (Cohen's $d=1.91$ ), comfort (Cohen's $d=1.74$ ), and happiness (Cohen's $d=1.19$ ). Some studies indicated decreases in some aspects of well-being which were not consistent with other aspects reported. For example, one study reported increases in stress, but decreases in anxiety and depression.                                                                                                                                                                         |
| Cuthbert, 2017                                                                                                                                                       | Across all studies, statistically significant results for the following outcomes in the physical activity groups were reported: (1) decrease in depression rates; (2) decrease in anger scores; (3) improvement in sleep quality; (4) lower systolic and diastolic blood pressure reactivity.                                                                                                                                                                                                                                                                                                                                                                                                                                                   |
| Doyle, 2020                                                                                                                                                          | Results were mixed across and within DyEx and DySplit studies. Of the DyEx studies, 6 examined caregiver psychosocial well-being. Beneficial outcomes in 4 studies indicated significant improvements in mental health and QoL of caregivers. In 3 DySplit interventions, caregivers experienced significant improvements to mental health when they were offered non-exercise interventions of either respite or a dyadic support group, while their care receivers exercised. 3 DyEx studies measured caregiver physical health. A resistance training intervention noted significant increases in muscle mass, strength, and physical function, but no significant difference in gait speed. Self-reported physical outcomes were equivocal. |
| Abbreviations: CI, confidence interval; QoL, quality of life; HR-QoL, health-related quality of life; DyEx, dyadic interventions; DySplit, non-dyadic interventions. |                                                                                                                                                                                                                                                                                                                                                                                                                                                                                                                                                                                                                                                                                                                                                 |

Supplementary Table 11. Summary of findings for interventions involving mindfulness-based activities

| First author, year                                                                                                                                                                                              | Summary of findings on effectiveness                                                                                                                                                                                                                                                                                                                                                                                                                                                                                                                                                                                                                                                                                                                                                                                                                                                                                                                                                                                                                                                                                                                              |
|-----------------------------------------------------------------------------------------------------------------------------------------------------------------------------------------------------------------|-------------------------------------------------------------------------------------------------------------------------------------------------------------------------------------------------------------------------------------------------------------------------------------------------------------------------------------------------------------------------------------------------------------------------------------------------------------------------------------------------------------------------------------------------------------------------------------------------------------------------------------------------------------------------------------------------------------------------------------------------------------------------------------------------------------------------------------------------------------------------------------------------------------------------------------------------------------------------------------------------------------------------------------------------------------------------------------------------------------------------------------------------------------------|
| Cheng, 2020                                                                                                                                                                                                     | Mindfulness-based interventions reduced depressive symptoms. For subjective well-being $G=0.31$ , $k=6$ , $N=212$ . For depression $G=-0.58$ , $k=7$ , $N=258$ .                                                                                                                                                                                                                                                                                                                                                                                                                                                                                                                                                                                                                                                                                                                                                                                                                                                                                                                                                                                                  |
| Liu, 2018                                                                                                                                                                                                       | MBSR vs active controls immediately after intervention: MBSR decreased depressive symptoms of caregivers compared with the active-control interventions: $SMD=-0.63$ (95% $CI=-0.98, -0.28$ , $p<0.001$ ). MBSR could reduce caregivers' anxiety compared with the active-control group immediately after the intervention period: $MD=-7.50$ (95% $CI=-13.11, -1.89$ , $p=0.009$ ). MBSR vs inactive controls immediately after intervention: no clear effect on depressive symptoms of caregivers in the MBSR group compared with the inactive controls immediately after the intervention period. MBSR may reduce caregivers' levels of anxiety compared with the inactive control immediately after the intervention period $MD=-7.27$ (95% $CI=-14.92, 0.38$ , $p=0.06$ ). MBSR vs controls at follow-up: compared with the active-control intervention, the results for depressive symptoms suggested that there may be little or no effect of MBSR $MD=-0.16$ (95% $CI=-0.71, 0.39$ , $p=0.57$ ). Compared with the inactive control, the results for caregivers' depressive symptoms slightly favored MBSR $MD=-3.00$ (95% $CI=-8.52, 2.52$ , $p=0.29$ ). |
| Shim, 2020                                                                                                                                                                                                      | 3 studies show that cognitive functioning was significantly improved in MBI conditions compared to both active and passive control conditions. 4 studies reported statistically significant improvements in self-reported measures of stress or distress in the MBI condition at post-treatment or follow-up with treatment effects in the small to medium range ( $G=-0.078$ to $-0.602$ ). 3 out of 7 studies examining depression/anxiety reported relative improvements. When compared with passive control interventions, caregivers in MBIs reported significant improvements in QoL. Long term effects were not that pronounced. No treatment differences in outcomes were found at 3- and 9-month follow-up assessments.                                                                                                                                                                                                                                                                                                                                                                                                                                  |
| Parkinson, 2019                                                                                                                                                                                                 | Some improvements were noted for patients' and their caregivers' anxiety scores following intervention, but these changes were not significant at post treatment or at follow-up. 1 study provided a narrative account of results and reported no change in anxiety scores following intervention for participants or family caregivers. Significant ( $p=0.01$ ) improvements in the tension/anxiety score were reported in 1 study. Caregivers experienced a mean reduction depression score in 5 studies, but the improvements in depression were often small and only significant in 3 studies.                                                                                                                                                                                                                                                                                                                                                                                                                                                                                                                                                               |
| Abbreviations: MBSR, Mindfulness-Based Stress Reduction; MBI, Mindfulness-Based Interventions; MCI, mild cognitive impairment; SMD, standardized mean difference; MD, mean difference; CI, confidence interval. |                                                                                                                                                                                                                                                                                                                                                                                                                                                                                                                                                                                                                                                                                                                                                                                                                                                                                                                                                                                                                                                                                                                                                                   |

Supplementary Table 12. Coding table for qualitative data

| Theme (and definition)                                                                                                                                      | Category (and definition)                                                                                                                                            | Sub-category (and definition)                                                                                                  | Fourth level construct codes                                                                               | Third level construct verbatim                                                                                                                                                                                                                                                                                                                        | References |
|-------------------------------------------------------------------------------------------------------------------------------------------------------------|----------------------------------------------------------------------------------------------------------------------------------------------------------------------|--------------------------------------------------------------------------------------------------------------------------------|------------------------------------------------------------------------------------------------------------|-------------------------------------------------------------------------------------------------------------------------------------------------------------------------------------------------------------------------------------------------------------------------------------------------------------------------------------------------------|------------|
| <b>Intervention outcomes:</b> this category describes potential beneficial and/or harmful effects to the caregiver from participating in the interventions. | <b>Health outcomes:</b> health benefits experienced and expressed by caregivers because of participating in support interventions.                                   | NA                                                                                                                             | Education/skills: hospital skills-building brings less anxiety, depression, burden, better quality of life | When interventions are provided to the caregiver in the context of the hospital setting to enhance these skills, there is a likelihood of reducing anxiety, depression, caregiver burden and improving QoL.                                                                                                                                           | Pritchard  |
|                                                                                                                                                             |                                                                                                                                                                      |                                                                                                                                | Mindfulness: benefits include relaxation, less depression, less worry, and anxiety                         | Triangulated qualitative and quantitative data suggests MBIs can improve relaxation, ease anxiety, and reduce depression for people with LTCs and their family caregivers. [...] The reported psychological benefits included increased relaxation, reduced worry, and reductions in anxiety.                                                         | Parkinson  |
| <b>Intervention outcomes:</b> this category describes potential beneficial and/or harmful effects to the caregiver from participating in the interventions. | <b>Social outcomes:</b> intervention outcomes related to impact on caregiver's social life, day-to-day routine and relationship with care receiver and other people. | <b>Practical social outcomes:</b> changes in caregivers' day-to-day routine, resulting from acquiring new skills or knowledge. | Case management: nurse and carer working together decreases burden                                         | A shared approach to care was found to be vital in decreasing burden among family members.                                                                                                                                                                                                                                                            | Goeman     |
|                                                                                                                                                             |                                                                                                                                                                      |                                                                                                                                | Case management: prevents crises                                                                           | Case management offered potential benefit to people with dementia, their carers and community-based professionals through continuity of care by a named trusted individual that could act proactively to prevent a crisis.                                                                                                                            | Goeman     |
|                                                                                                                                                             |                                                                                                                                                                      |                                                                                                                                | Case management: admiral nurses have good relationship with carers and care receivers                      | Admiral nurse: Positive outcomes in the carer/key worker relationship to be linked to the quality of the relationship and involve the carer and professional care worker actively including and working with the person with dementia.                                                                                                                | Goeman     |
|                                                                                                                                                             |                                                                                                                                                                      |                                                                                                                                | Psychoeducation: brings satisfaction, coping skills, competence, confidence, less burden, less loneliness  | Increased satisfaction with support, coping skills, caregiving competence, confidence, and decreased burden and loneliness.                                                                                                                                                                                                                           | Smith      |
|                                                                                                                                                             |                                                                                                                                                                      |                                                                                                                                | Psychoeducation: brings increased knowledge, coping, confidence, less isolation                            | Increased knowledge of the disease and caring was described in 3 papers, in addition to increased coping with caregiving (2 papers) confidence in caregiver skills (2 papers) and reduced feelings of isolation (1 paper).                                                                                                                            | Boots      |
|                                                                                                                                                             |                                                                                                                                                                      |                                                                                                                                | Education/skills: Strong relationship between health staff and carers needed for continued informal care   | When health professionals build strong relationships with the caregiver, they are more likely to be able to support the readiness of the caregiver to continue their role.                                                                                                                                                                            | Pritchard  |
|                                                                                                                                                             |                                                                                                                                                                      |                                                                                                                                | Education/skills: when needs are met, coping is better                                                     | Caregivers identified when personal characteristics of both patient and caregiver are considered, caregivers are included as an integral part of the team (as they requested), and they receive timely and effective information, the level of stress is likely to reduce, and their ability to cope to be ready for discharge is likely to increase. | Pritchard  |

|                                                                                                                                                             |                                                                                                                                                                      |                                                                                                                                |                                                                                          |                                                                                                                                                                                                                                                                                                                                                                    |           |
|-------------------------------------------------------------------------------------------------------------------------------------------------------------|----------------------------------------------------------------------------------------------------------------------------------------------------------------------|--------------------------------------------------------------------------------------------------------------------------------|------------------------------------------------------------------------------------------|--------------------------------------------------------------------------------------------------------------------------------------------------------------------------------------------------------------------------------------------------------------------------------------------------------------------------------------------------------------------|-----------|
|                                                                                                                                                             |                                                                                                                                                                      |                                                                                                                                | Education/skills: carers' coping mechanisms promoted                                     | The interventions addressed the need for clear information about the disease, identification of psychological response, development of coping mechanisms and assessment of the home environment.                                                                                                                                                                   | Pritchard |
|                                                                                                                                                             |                                                                                                                                                                      |                                                                                                                                | Counselling: counsellors help with seemingly helpless situations                         | Being able to describe and discuss problematic situations helps carers in their daily lives when they do not know how what to do next, because, from their perspective, they have tried everything but have not been able to resolve the situation.                                                                                                                | Lins      |
|                                                                                                                                                             |                                                                                                                                                                      |                                                                                                                                | Counselling: counsellors knowledgeable about services is helpful                         | Carers find the information provided helpful and are grateful for it. The information and advice help them to do certain things better, which leads to them feeling happier with themselves.                                                                                                                                                                       | Lins      |
|                                                                                                                                                             |                                                                                                                                                                      |                                                                                                                                | Respite: free time used for leisure or chores                                            | The respite time gained through this type of care tended to be used for necessary everyday chores. Also used to carry out pleasurable activities on a regular basis.                                                                                                                                                                                               | Shaw      |
|                                                                                                                                                             |                                                                                                                                                                      |                                                                                                                                | Respite: carers more in control of time                                                  | Shorter-term respite such as day care was felt to give structure to the carer's week along with a sense of normality as the free time matched the ebb and flow of caregiving activities.                                                                                                                                                                           | Shaw      |
|                                                                                                                                                             |                                                                                                                                                                      |                                                                                                                                | Respite: use of service can be more emotionally and physically demanding than not use    | There were many hassles (i.e., inconveniences, irritations and frustrations that were troublesome to deal with) involved in the preparation for respite care. These hassles were costly in terms of the physical and emotional energy involved in dealing with them, and these costs were weighed against the benefits received from respite.                      | Shaw      |
|                                                                                                                                                             |                                                                                                                                                                      |                                                                                                                                | Respite: brings organized routine                                                        | Regular attendance is also perceived by carers to provide their care recipients with a sense of structure and routine to their daily lives.                                                                                                                                                                                                                        | Du Preez  |
|                                                                                                                                                             |                                                                                                                                                                      |                                                                                                                                | Creative arts: benefits include learning, stimulation, normalizing care receivers' lives | Reported benefits included new learning, stimulation and the accessibility of the activities, which creates a sense of normalcy and altered perceptions about PWD's abilities.                                                                                                                                                                                     | Bourne    |
|                                                                                                                                                             |                                                                                                                                                                      |                                                                                                                                | Creative arts: artmaking helps with coping and resilience                                | Artmaking was seen to cope and practice resilience, where this approach allowed caregivers to make the most of their lives and to deal with an uncertain future: "It slightly reminds me of the turmoil but at the same time it says to me yes, you got through it [...] Because they [a series of paintings] were part of the process of me becoming well again." | Irons     |
| <b>Intervention outcomes:</b> this category describes potential beneficial and/or harmful effects to the caregiver from participating in the interventions. | <b>Social outcomes:</b> intervention outcomes related to impact on caregiver's social life, day-to-day routine and relationship with care receiver and other people. | <b>Emotional social outcomes:</b> changes in feelings and emotional reflections of caregivers, resulting from an intervention. | Psychoeducation: Online intervention reduces stress                                      | Caregivers subjectively identified that the online intervention helped them cope with the stress of caregiving.                                                                                                                                                                                                                                                    | Sin       |
|                                                                                                                                                             |                                                                                                                                                                      |                                                                                                                                | Education/skills: When needs are met, stress is reduced                                  | Caregivers identified when personal characteristics of both patient and caregiver are considered, caregivers are included as an integral part of the team (as they requested), and they receive timely and                                                                                                                                                         | Pritchard |

|                                                                                 |                                                                                                                                                                                                                                                                                                                                                                                                               |      |
|---------------------------------------------------------------------------------|---------------------------------------------------------------------------------------------------------------------------------------------------------------------------------------------------------------------------------------------------------------------------------------------------------------------------------------------------------------------------------------------------------------|------|
|                                                                                 | effective information, the level of stress is likely to reduce, and their ability to cope to be ready for discharge is likely to increase.                                                                                                                                                                                                                                                                    |      |
| Counselling: carers appreciate conversations beyond their nursing duties        | Carers also find it helpful to have conversations about other things that do not remind them of their nursing duties.                                                                                                                                                                                                                                                                                         | Lins |
| Psychosocial: Benefits of peer support include less discomfort and satisfaction | Qualitative measures on well-being reported improvements on subjective satisfaction, and reduced feelings of discomfort and embarrassment.                                                                                                                                                                                                                                                                    | Dam  |
| Psychosocial: group support brings relief through sharing                       | Qualitative interview data on support groups for only caregivers demonstrated a sense of relief through sharing problems and new social contact.                                                                                                                                                                                                                                                              | Dam  |
| Psychosocial: peer support brings emotional support and enjoyment               | Qualitative social support outcomes demonstrated reduced feelings of social isolation, increased emotional support, and mutual sharing and enjoyment after receiving peer support.                                                                                                                                                                                                                            | Dam  |
| Counselling: simple chit chat brings relief                                     | The participants in the control group had conversations only about general topics such as the weather, television, movies, news, or social activities. Such a conversation about common topics was found to be a helpful alternative to relieve carers.                                                                                                                                                       | Lins |
| Counselling: self-expression beneficial                                         | Carers benefit from being able to express their helplessness.                                                                                                                                                                                                                                                                                                                                                 | Lins |
| Respite: respite gives physical break but not mental break/relaxation           | The qualitative review also pointed out that a physical break from the care recipient was probably not sufficient in itself to provide the mental break that was needed by most carers to improve their well-being. A mental break meant freedom from worry and total disengagement from the caring role. This was only achieved in the knowledge that the care recipient was happy, safe and well cared for. | Shaw |
| Respite: caregivers feel guilty to not care                                     | The strong commitment to caring and eventual realisation that they cannot cope on their own leads not only to feelings of failure but also to feelings of guilt. The negative connotations of respite and the feelings of abandonment also contribute to guilt.                                                                                                                                               | Shaw |
| Respite: sense of failure when admitting need of help                           | The types of attitudes discussed above that drive the desire to maintain the care recipient at home can lead to a sense of failure when a need for support is acknowledged, particularly in the presence of negative attitudes to respite care itself.                                                                                                                                                        | Shaw |
| Respite: feelings of guilt and perceived abandonment with respite               | In the early stages it was felt by carers that attendance at day care could confront a care recipient's denial of their condition, and so a pretence of normality is maintained as long as possible to maintain the integrity of the care recipient's self-image. The outcome in                                                                                                                              | Shaw |

|                                                                                                                      |                                                                                                                                                                                                                             |          |
|----------------------------------------------------------------------------------------------------------------------|-----------------------------------------------------------------------------------------------------------------------------------------------------------------------------------------------------------------------------|----------|
|                                                                                                                      | relation to many of the issues described above is the carer’s feeling of guilt.                                                                                                                                             |          |
| Respite: more guilt among women                                                                                      | If respite is seen as benefiting only the carer this will be viewed in a selfish light, which can trigger guilt, particularly in women who have spent their lives caring for others                                         | Shaw     |
| Respite improves mood and engagement with care recipient                                                             | Carers reported increased engagement with their care recipients upon returning from adult day service attendance. This was due to their improved mood and them sharing interesting events that occurred throughout the day. | Du Preez |
| Creative arts: singing brings enjoyment                                                                              | All six studies included comments on improved mood or well-being and three on the extended impact in terms of mood, the enjoyment of singing at home and socializing with other members outside of the group.               | Bourne   |
| Creative arts: familiar songs promote reminiscence                                                                   | Participants also reported gaining enjoyment from singing familiar songs that facilitated reminiscence.                                                                                                                     | Bourne   |
| Creative arts: benefits include self-esteem, positive affect, enjoyment, relaxation, energy, empowerment, confidence | Experiences including improved personal wellbeing, self-esteem, positive affect, enjoyment, relaxation, feeling energized, empowered and having confidence were captured in this meta-theme.                                | Irons    |
| Creative arts: socioemotional connection brings sense of belonging                                                   | Papers highlighted the socio-emotional connection afforded by participation in weekly creative interventions, which gave both caregiver and care-recipient something to look forward to attending and be part of.           | Irons    |
| Creative arts: practicing skills gives cognitive stimulation and engagement                                          | The cognitive impact of intervention participation included cognitive stimulation and engagement, through the practice of previously acquired skills (such as demonstrating musical knowledge).                             | Irons    |
| Creative arts: reminiscence promoted                                                                                 | Creative interventions were useful for reactivating memories and afforded opportunities for memory recall of events.                                                                                                        | Irons    |
| Creative arts: dyads working together feel hopeful                                                                   | In an intervention where caregivers and care-recipients met to create a database, this evoked positive feelings and hope for the caregivers.                                                                                | Irons    |
| Creative arts: carers reclaim identity through creative interventions                                                | Creative interventions that allow for self-expression offer opportunities to caregivers to reclaim and transform their identity.                                                                                            | Irons    |
| Creative arts: song hearing fosters emotions                                                                         | In some cases, the meaning behind song lyrics evolved with the carer journey, with the song resonating and created an emotional response upon hearing the song.                                                             | Irons    |

|                                                                                          |                                                                                                                                                                                                                                                                                                                                                                                                                                                                                                                                                                       |        |
|------------------------------------------------------------------------------------------|-----------------------------------------------------------------------------------------------------------------------------------------------------------------------------------------------------------------------------------------------------------------------------------------------------------------------------------------------------------------------------------------------------------------------------------------------------------------------------------------------------------------------------------------------------------------------|--------|
| Creative arts: creative interventions help for self-expression and emotional release     | Participation in creative interventions allowed participants to have new experiences and to develop confidence to express oneself. For example, as one participant stated: “It probably unloads a lot of the...all the emotional feelings that you do hang on to that you don’t even realise are there sometimes so it helps to get them out...it was good and it was cathartic. Even though I say I don’t hold a lot you probably do have a bit of baggage and just talking about it and bringing out all those different words was, good and just very satisfying.” | Irons  |
| Creative arts: good for mindfulness                                                      | Three papers reported the recognition some caregivers had on the importance of mindfulness and living in the moment, and that these interventions created the space for this to be experienced.                                                                                                                                                                                                                                                                                                                                                                       | Irons  |
| Creative arts: singing decreases distress                                                | Some papers reported that caregivers found singing allowed them to focus and concentrate on the task of singing and develop present moment awareness, allowing them to let go of other distressing or negative thoughts.                                                                                                                                                                                                                                                                                                                                              | Irons  |
| Creative arts: more clarity in thoughts and rational thinking                            | Themes related to increased lucidity, where caregivers reported clarity of thoughts and increased rational thinking.                                                                                                                                                                                                                                                                                                                                                                                                                                                  | Irons  |
| Creative arts: singing benefits include better mood and well-being                       | All six studies included comments on improved mood or well-being and three on the extended impact in terms of mood.                                                                                                                                                                                                                                                                                                                                                                                                                                                   | Bourne |
| Creative arts: interventions do not reduce negative emotions, but increase positive ones | Interestingly this meta-theme did not mention the reduction of negative emotions and instead highlighted the increase in positive ones. This suggests the negative feelings were not removed by participation in creative caregiving interventions; however, caregivers and care-recipients experienced positive changes as a result of participation in these creative interventions.                                                                                                                                                                                | Irons  |
| Creative arts: art gallery is empowering                                                 | The structure, ambience and environment of an intervention was key to shaping and facilitating participants’ experiences. For example, singing as part of a group was reported as an enabler for participation in interventions aimed at caregivers and care-recipients and an art gallery setting created an empowering space for participants                                                                                                                                                                                                                       | Irons  |
| Creative arts: carers happy to see care receivers happy                                  | The intervention activities were opportunities for playful experimentation, which was deemed the antithesis of caregiving, bringing about restorative feelings to caregivers and care-recipients. The caregivers experienced an increase in positive mood when they saw care-recipients expressing happiness due to participating in the intervention.                                                                                                                                                                                                                | Irons  |

|                                                                                                                                                             |                                                                                                                                                                      |                                                                                                                             |                                                                                       |                                                                                                                                                                                                                                                                                    |          |
|-------------------------------------------------------------------------------------------------------------------------------------------------------------|----------------------------------------------------------------------------------------------------------------------------------------------------------------------|-----------------------------------------------------------------------------------------------------------------------------|---------------------------------------------------------------------------------------|------------------------------------------------------------------------------------------------------------------------------------------------------------------------------------------------------------------------------------------------------------------------------------|----------|
| <b>Intervention outcomes:</b> this category describes potential beneficial and/or harmful effects to the caregiver from participating in the interventions. | <b>Social outcomes:</b> intervention outcomes related to impact on caregiver’s social life, day-to-day routine and relationship with care receiver and other people. | <b>Relational social outcomes:</b> changes in caregivers’ relationship with either the care receiver or people around them. | Mindfulness: intervention is enjoyable                                                | Qualitatively, participants felt positive about MBSR and enjoyed participating.                                                                                                                                                                                                    | Li       |
|                                                                                                                                                             |                                                                                                                                                                      |                                                                                                                             | Mindfulness: benefits include compassion and forgiveness                              | Qualitatively, participants reported the continued use of mindful based exercise and personal benefits of fostered compassion and forgiveness from the program.                                                                                                                    | Li       |
|                                                                                                                                                             |                                                                                                                                                                      |                                                                                                                             | Psychosocial: peer support leads to less isolation through mutual sharing             | Qualitative social support outcomes demonstrated reduced feelings of social isolation, increased emotional support, and mutual sharing and enjoyment after receiving peer support.                                                                                                 | Dam      |
|                                                                                                                                                             |                                                                                                                                                                      |                                                                                                                             | Respite: improved dyadic relationship                                                 | Carers reported increased engagement with their care recipients upon returning from adult day service attendance.                                                                                                                                                                  | Du Preez |
|                                                                                                                                                             |                                                                                                                                                                      |                                                                                                                             | Creative arts: dyadic facilitates reciprocity                                         | As the group was for both partners of the dyad and reported to be accessible, this may have had a positive influence on relationships and communication, facilitating a sense of reciprocity.                                                                                      | Bourne   |
|                                                                                                                                                             |                                                                                                                                                                      |                                                                                                                             | Creative arts: singing brings more socializing                                        | All six studies included comments on improved mood or well-being and three on the extended impact in terms of mood, the enjoyment of singing at home and socialising with other members outside of the group.                                                                      | Bourne   |
|                                                                                                                                                             |                                                                                                                                                                      |                                                                                                                             | Creative arts: interventions give a feeling of equal dyadic relationships             | Caregivers felt participation in the creative interventions allowed for interactions that were more equal and person-centred, as opposed to the usual caregiver–care-recipient dyad experiences that tended to occur outside the intervention.                                     | Irons    |
|                                                                                                                                                             |                                                                                                                                                                      |                                                                                                                             | Creative arts: benefits of dyadic intervention: communication within dyads and others | As a result of participating in the intervention together, improved communication was reported by caregivers, not only within the dyads but also with other participants in the interventions and family members.                                                                  | Irons    |
|                                                                                                                                                             |                                                                                                                                                                      |                                                                                                                             | Creative arts: interventions make dyads forget about the disease                      | Several papers described the opportunity for joint respite for the caregiver and care-recipient dyad to focus on the experience of the creative intervention, without needing to focus on the condition.                                                                           | Irons    |
|                                                                                                                                                             |                                                                                                                                                                      |                                                                                                                             | Creative arts: dyad to dyad collaboration through singing                             | Furthermore, in a singing intervention, the social proximity of caregivers and their care-recipients to other caregivers and care-recipients were highly valued. The songs represented a shared experience, and this shared experience and collaboration was considered important. | Irons    |
|                                                                                                                                                             |                                                                                                                                                                      |                                                                                                                             | Creative arts: interventions make patients care recipients seem normal again          | Participation in creative interventions allowed for caregivers to view the care-recipient in a different light, which led to increased satisfaction with caregiving role.                                                                                                          | Irons    |

|                                                                                                          |                                                                              |                                                                                                                             |                                                                            |                                                                                                                                                                                                                                                                                                                                                                   |       |
|----------------------------------------------------------------------------------------------------------|------------------------------------------------------------------------------|-----------------------------------------------------------------------------------------------------------------------------|----------------------------------------------------------------------------|-------------------------------------------------------------------------------------------------------------------------------------------------------------------------------------------------------------------------------------------------------------------------------------------------------------------------------------------------------------------|-------|
| Implementation outcomes: the effects of deliberate and purposive actions to implement the interventions. | Acceptability: degree to which an intervention is perceived to be agreeable. | Trust, dignity and values: the role of trust, respect, ethics and dignity in determining acceptability of the intervention. | Creative arts: better dyadic relationship                                  | The process of creating a ‘time capsule’ database of music and photos from couples’ lives evoked strong positive feelings and led to improved quality time for caregivers and their care-recipients.                                                                                                                                                              | Irons |
|                                                                                                          |                                                                              |                                                                                                                             | Creative arts: improved image of care receivers                            | The demonstration of memory and recall over the weeks was encouraging for caregivers to see with care-recipients.                                                                                                                                                                                                                                                 | Irons |
|                                                                                                          |                                                                              |                                                                                                                             | Creative arts: better relationship based on a new common interest          | Meaningful connections made with care-recipient through the creation of art allowed caregivers to build social connections that were based on mutual interests rather than the caregiving.                                                                                                                                                                        | Irons |
|                                                                                                          |                                                                              |                                                                                                                             | Creative arts: dyadic better for spousal relationships                     | Additionally, papers reported other social benefits, including enhanced spousal relationship and strengthened reciprocity between caregiver and care-recipient.                                                                                                                                                                                                   | Irons |
|                                                                                                          |                                                                              |                                                                                                                             | Case management: carers trust and appreciate admiral nurses they know well | There was evidence that carers valued interacting with a professional that they knew well, and descriptions of Admiral Nurses included ‘my anchor’, ‘life-saving’ ‘an angel’ and ‘worth her weight in gold’.                                                                                                                                                      | Bunn  |
|                                                                                                          |                                                                              |                                                                                                                             | Counselling: carers want to have a reliable person by their side           | Carers express their desire to know they have a reliable person by their side.                                                                                                                                                                                                                                                                                    | Lins  |
|                                                                                                          |                                                                              |                                                                                                                             | Counselling: carers reluctant to unknown counsellors’ advice               | A carer also expressed reservations about the idea of getting good advice from an unknown person since the disease has a great variety of manifestations.                                                                                                                                                                                                         | Lins  |
|                                                                                                          |                                                                              |                                                                                                                             | Counselling: carers sensitive to judgement                                 | Carers will consciously or unconsciously notice the emotional attitude of the counsellor, which can lead them to trust the counselling less and experience it as unhelpful.                                                                                                                                                                                       | Lins  |
|                                                                                                          |                                                                              |                                                                                                                             | Counselling: counsellors should be familiar with cases and caregivers      | Carers can appreciate the counsellor as a person and know that the counsellor is familiar with their situation and can understand the situations the carer describes.                                                                                                                                                                                             | Lins  |
|                                                                                                          |                                                                              |                                                                                                                             | Counselling: thorough counselling determines trust from caregiver          | At the same time, the level of thoroughness with which counsellors convey the content of the discussion has an impact on how reliable and trustworthy the carer experiences the counsellor.                                                                                                                                                                       | Lins  |
|                                                                                                          |                                                                              |                                                                                                                             | Counselling: knowing the counsellors builds rapport and is more effective  | The descriptive theme of ‘Knowing each other’ on the other hand, might have a positive impact on the counselling, partly because when counselling is not anonymous it helps counsellors to manage the frustrations of the carers, and partly because it lays the groundwork for becoming ‘Familiar and trusted’, which is the relationship desired by the carers. | Lins  |

|                                                                                                    |                                                                                                                                                                                                                                                                |          |
|----------------------------------------------------------------------------------------------------|----------------------------------------------------------------------------------------------------------------------------------------------------------------------------------------------------------------------------------------------------------------|----------|
| Counselling: service should be non-judgmental and appreciative                                     | Non-judgmental/appreciative. This descriptive theme describes how the attitude of the counsellor needs to be non-judgmental towards the ‘non-professional’ care provided by the carers and needs to convey appreciation for their great efforts.               | Lins     |
| Counselling: building rapport with caregivers is important                                         | Carers and counsellors agree on the importance of getting to know each other before counselling.                                                                                                                                                               | Lins     |
| Respite: dignity of care receiver more important than symptom management                           | Phinney and Moody argue that community-based services that endeavor to minimize stigma and normalize attendee’s experiences, rather than focus on symptom management, may attract greater utilization.                                                         | Du Preez |
| Respite: respect and dignity for care receiver important                                           | Additionally, carers expect their care recipients to be treated with care, respect, and dignity while attending an adult day service.                                                                                                                          | Du Preez |
| Respite: separation promotes stigmatization                                                        | Whilst separation may lead to stigmatization, group inclusion for attendees with cognitive decline appeared to promote their disengagement from activities requiring cognitive demand.                                                                         | Du Preez |
| Respite: privacy violation is problematic                                                          | Factors such as concern for privacy violation and cost of service provision diminishes use of services by carers.                                                                                                                                              | Du Preez |
| Respite: self-sufficiency, privacy and independence determine dyad’s resistance to use the service | Values of self-sufficiency, privacy and independence that were displayed by carers were also held by the care recipients themselves, which contributed to resistance to service use.                                                                           | Shaw     |
| Respite: staff don’t respect care receiver                                                         | Other negative attitudes towards respite included the view that it is demeaning for the care recipient, with its connotations of babysitting. This was not helped by experiences of a perceived lack of respect for the care recipient from formal care staff. | Shaw     |
| Respite: service is demeaning for care receiver                                                    | Other negative attitudes towards respite included the view that it is demeaning for the care recipient, with its connotations of babysitting.                                                                                                                  | Shaw     |
| Respite: trust is important to accept sitters                                                      | Indeed, this was mentioned by carers in several of the studies – the trust that is required of people coming into the home in this capacity.                                                                                                                   | Shaw     |
| Creative arts: staff values and perspectives important for participants’ experiences               | The values and perspectives of the staff and those involved in the delivery of interventions were also pertinent to participants’ experience of the interventions.                                                                                             | Irons    |
| Creative arts: non-judgmental and active listening environment is important                        | A non-judgmental group approach was considered important to enable caregivers to voice their experiences with willing listeners, to share joy and sadness and to feel valued by others.                                                                        | Irons    |

|                                                                                                                    |                                                                                     |                                                                                                                                              |                                                                             |                                                                                                                                                                                                                                                                                  |         |
|--------------------------------------------------------------------------------------------------------------------|-------------------------------------------------------------------------------------|----------------------------------------------------------------------------------------------------------------------------------------------|-----------------------------------------------------------------------------|----------------------------------------------------------------------------------------------------------------------------------------------------------------------------------------------------------------------------------------------------------------------------------|---------|
| <b>Implementation outcomes:</b><br>the effects of deliberate and purposive actions to implement the interventions. | <b>Acceptability:</b> degree to which an intervention is perceived to be agreeable. | <b>Person-centeredness:</b><br>personalization and flexibility of interventions promote acceptability of the intervention by the caregivers. | Case management: flexibility is valued                                      | The importance of the relational aspect of the role including face-to-face contact and opportunities to explain their needs and concerns in a time and manner of their preference were found to be integral to the person with dementia and carer's ability to adjust to change. | Goeman  |
|                                                                                                                    |                                                                                     |                                                                                                                                              | Case management: person-centered approach is welcome                        | A distinguishing characteristic of Admiral Nurses was their carer-centred approach and there was evidence that carers welcomed a service which focused on them.                                                                                                                  | Bunn    |
|                                                                                                                    |                                                                                     |                                                                                                                                              | Psychoeducation: flexibility in access is valued                            | Common elements of the interventions that were repeatedly highlighted and attributed to high satisfaction included: flexibility in access suiting carers' lifestyles and commitments.                                                                                            | Sin     |
|                                                                                                                    |                                                                                     |                                                                                                                                              | Psychoeducation: personalization of interventions is valued                 | Common elements of the interventions that were repeatedly highlighted and attributed to high satisfaction included: [...] availability of self-tailored and -paced programme allowing for individualised information and support.                                                | Sin     |
|                                                                                                                    |                                                                                     |                                                                                                                                              | Psychoeducation: individualized approach is preferred                       | The qualitative data supports the use of patient and carer information and support PCIS but suggests that there is not a one-size-fits-all approach which can be used, as every patient with dementia and their carers will have different needs, preferences and responses.     | Miles   |
|                                                                                                                    |                                                                                     |                                                                                                                                              | Psychoeducation: personalized information highly valued                     | When information was individualized, it was considered by caregivers as one of the most useful functionalities of the intervention.                                                                                                                                              | Hopwood |
|                                                                                                                    |                                                                                     |                                                                                                                                              | Psychoeducation: carers don't appreciate generic information                | [...] with caregivers expressing frustration when required to review information that did not meet their specific needs.                                                                                                                                                         | Hopwood |
|                                                                                                                    |                                                                                     |                                                                                                                                              | Respite: carers' and care receivers' needs-based service is more acceptable | For respite to be acceptable it must respond to both the carer's and the care recipient's needs.                                                                                                                                                                                 | Shaw    |
|                                                                                                                    |                                                                                     |                                                                                                                                              | Respite: care receiver's happiness, health and safety cause concern         | Beisecker et al. reports that 'perceptions about patient unhappiness, safety, physical health, functional levels and behaviour were viewed as barriers to ADC use'.                                                                                                              | Shaw    |
|                                                                                                                    |                                                                                     |                                                                                                                                              | Respite: distress of care receivers causes concern                          | Care recipient distress was a commonly reported impact, which frequently took some time to recover from after return home.                                                                                                                                                       | Shaw    |
|                                                                                                                    |                                                                                     |                                                                                                                                              | Respite: quality of care of care receivers is essential                     | A barrier to the uptake of respite services was a concern about the quality of care provided and this concern was most notable in relation to nursing homes, although home care was also sometimes problematic.                                                                  | Shaw    |

|                                                                                                          |                                                                              |                                                                                                          |                                                                               |                                                                                                                                                                                                                                                                                                                                                                                                                                      |        |
|----------------------------------------------------------------------------------------------------------|------------------------------------------------------------------------------|----------------------------------------------------------------------------------------------------------|-------------------------------------------------------------------------------|--------------------------------------------------------------------------------------------------------------------------------------------------------------------------------------------------------------------------------------------------------------------------------------------------------------------------------------------------------------------------------------------------------------------------------------|--------|
|                                                                                                          |                                                                              |                                                                                                          | Respite: care receiver’s cooperation is important to participate              | Gaining the care recipient’s co-operation was one of the major hassles involved, which was reported particularly in relation to day care.                                                                                                                                                                                                                                                                                            | Shaw   |
|                                                                                                          |                                                                              |                                                                                                          | Creative arts: dyadic intervention allows for person-centered interaction     | Caregivers felt participation in the creative interventions allowed for interactions that were more equal and person-centred, as opposed to the usual caregiver–care-recipient dyad experiences that tended to occur outside the intervention.                                                                                                                                                                                       | Irons  |
|                                                                                                          |                                                                              |                                                                                                          | Creative arts: flexibility is key                                             | One key recommendation was to engage the assistance of a qualified music therapist, who is trained in adapting an intervention according to individual needs and preferences, including addressing behavioural challenge, thus affording flexibility in structure which was seen as key to caregiver satisfaction and continued participation in the intervention.                                                                   | Irons  |
|                                                                                                          |                                                                              |                                                                                                          | Creative arts: intervention should be tailored to abilities                   | One caregiver stated their views about their perceptions of their partner with dementia who also participated in the intervention: “. . .she loves the looking. One of the things she mentioned a number of times is how important it is, the silence at the beginning, where they really get a chance to look. And I think that for people with. . . slow processing skills, not poor but slow, that element is just so important.” | Irons  |
|                                                                                                          |                                                                              |                                                                                                          | Creative arts: intervention should be tailored to care receiver’s abilities   | In one study, participants were critical of the intervention protocol, as some caregivers found it difficult to engage the care-recipient or experienced frustration with the care-recipients’ lack of focus, suggesting there were lessons to be learned for future enhancements of the intervention.                                                                                                                               | Irons  |
| Implementation outcomes: the effects of deliberate and purposive actions to implement the interventions. | Acceptability: degree to which an intervention is perceived to be agreeable. | Culture and language: ethnic, cultural and religious values influence acceptability of the intervention. | Case management: multicultural staff better at supporting diverse communities | A shared approach to care was found to be vital in decreasing burden among family members and that due to their close relationship and knowledge of families, multicultural workers can offer an important perspective that is invaluable in informing the provision of carer education and support within CALD communities.                                                                                                         | Goeman |
|                                                                                                          |                                                                              |                                                                                                          | Counselling: native language is preferred                                     | Receiving counselling in the native language was also shown to contribute to building trust.                                                                                                                                                                                                                                                                                                                                         | Lins   |
|                                                                                                          |                                                                              |                                                                                                          | Counselling: language can be a barrier in telephone counselling               | Telephone counselling of carers who do not speak the national language is problematic.                                                                                                                                                                                                                                                                                                                                               | Lins   |
|                                                                                                          |                                                                              |                                                                                                          | Respite: minorities prefer sitters of same ethnicity and gender               | In this context this referred to ensuring that carers were of the same ethnic group, spoke the same language and were preferably of the same gender as the care recipient.                                                                                                                                                                                                                                                           | Shaw   |

|                                                                                                                 |                                                                                     |                                                                                                                                                |                                                                          |                                                                                                                                                                                                                                                                                                                                                                                                 |          |
|-----------------------------------------------------------------------------------------------------------------|-------------------------------------------------------------------------------------|------------------------------------------------------------------------------------------------------------------------------------------------|--------------------------------------------------------------------------|-------------------------------------------------------------------------------------------------------------------------------------------------------------------------------------------------------------------------------------------------------------------------------------------------------------------------------------------------------------------------------------------------|----------|
|                                                                                                                 |                                                                                     |                                                                                                                                                | Respite: culture is important in determining demand for respite          | Personal and cultural attitudes to the caring role and to the function and purpose of respite services may impact on the carers' perceptions of their needs for respite.                                                                                                                                                                                                                        | Shaw     |
|                                                                                                                 |                                                                                     |                                                                                                                                                | Respite: respect for culture and religious identity valued               | Other important considerations for carers were that food was appropriate for their religion, for example vegetarian, and that the service was sensitive to other cultural and religious differences.                                                                                                                                                                                            | Shaw     |
| <b>Implementation outcomes:</b> the effects of deliberate and purposive actions to implement the interventions. | <b>Acceptability:</b> degree to which an intervention is perceived to be agreeable. | <b>Setting of the intervention:</b> environmental, social and structural components of the interventions that promote or hinder acceptability. | Psychoeducation: rapport with professionals and peers harder online      | In a small number of studies, despite extensive recruitment efforts and provision of equipment and technical support, recruitment and completion rates still struggled as some carers reported finding it difficult to strike up a rapport with the professionals and their carer-peers and would still prefer the conventional delivery media using face to face group or individual meetings. | Sin      |
|                                                                                                                 |                                                                                     |                                                                                                                                                | Psychoeducation: support from carer networks and professionals is valued | Common elements of the interventions that were repeatedly highlighted and attributed to high satisfaction included: [...] and network support through online forums with other carers and access to professionals.                                                                                                                                                                              | Sin      |
|                                                                                                                 |                                                                                     |                                                                                                                                                | Psychoeducation: interaction among participants is important             | Negative from one study: lack of interaction with other participants.                                                                                                                                                                                                                                                                                                                           | Boots    |
|                                                                                                                 |                                                                                     |                                                                                                                                                | Respite: in home care preferred over day care                            | Because of difficulties with day care many carers in the studies reported a preference for in-home care as being less disruptive for the care recipient.                                                                                                                                                                                                                                        | Shaw     |
|                                                                                                                 |                                                                                     |                                                                                                                                                | Respite: turnover of staff is disruptive                                 | One other major area of difficulty was related to the lack of continuity of care and the high turnover of staff in support services.                                                                                                                                                                                                                                                            | Shaw     |
|                                                                                                                 |                                                                                     |                                                                                                                                                | Respite: caregivers not informed about activities at respite             | Family carers have little to no contact with the adult day service other than to ready their care recipient for the day's attendance and have little knowledge of how their care recipient spends their time while attending adult day service.                                                                                                                                                 | Du Preez |
|                                                                                                                 |                                                                                     |                                                                                                                                                | Creative arts: carers appreciate having a special place                  | One paper found that caregivers in an intervention considered themselves ordinary users of a community place that was "somewhere different" and valued as a special place.                                                                                                                                                                                                                      | Irons    |
|                                                                                                                 |                                                                                     |                                                                                                                                                | Creative arts: group singing is better                                   | The structure, ambience and environment of an intervention was key to shaping and facilitating participants' experiences. For example, singing as part of a group was reported as an enabler for participation in interventions aimed at caregivers and care-recipients.                                                                                                                        | Irons    |
|                                                                                                                 |                                                                                     |                                                                                                                                                | Creative arts: creative interventions offer interactive space            | Papers presented themes around caregivers' and care-recipients' appreciation of a time and space afforded by the creative interventions to enable greater communication, and a natural                                                                                                                                                                                                          | Irons    |

|                                                                                                                 |                                                                                                                                                                                                                                                                                                       |                                                                                                                      |                                                                                    |                                                                                                                                                                                                                                                                                      |          |
|-----------------------------------------------------------------------------------------------------------------|-------------------------------------------------------------------------------------------------------------------------------------------------------------------------------------------------------------------------------------------------------------------------------------------------------|----------------------------------------------------------------------------------------------------------------------|------------------------------------------------------------------------------------|--------------------------------------------------------------------------------------------------------------------------------------------------------------------------------------------------------------------------------------------------------------------------------------|----------|
|                                                                                                                 |                                                                                                                                                                                                                                                                                                       |                                                                                                                      |                                                                                    | development of social interactions both with the caregiver and other participants in the interventions.                                                                                                                                                                              |          |
|                                                                                                                 |                                                                                                                                                                                                                                                                                                       |                                                                                                                      | Creative arts: gallery setting and facilitator important for art viewing           | Two papers highlighted the importance of the gallery setting and facilitator characteristics.                                                                                                                                                                                        | Bourne   |
| <b>Implementation outcomes:</b> the effects of deliberate and purposive actions to implement the interventions. | <b>Acceptability:</b> degree to which an intervention is perceived to be agreeable.                                                                                                                                                                                                                   | <b>Other:</b> other determinants of acceptability, not groupable.                                                    | Psychoeducation: eHealth highly acceptable                                         | In general, carers' perceived acceptability of the eHealth interventions across the studies synthesized was high.                                                                                                                                                                    | Sin      |
|                                                                                                                 |                                                                                                                                                                                                                                                                                                       |                                                                                                                      | Psychoeducation: relatable experiences important                                   | Experiential similarity is seen as important                                                                                                                                                                                                                                         | Smith    |
|                                                                                                                 |                                                                                                                                                                                                                                                                                                       |                                                                                                                      | Creative arts: caregivers skeptical about their contributions to the interventions | Prior to joining the interventions, caregivers had deliberations around what to expect, including assumptions that they had nothing to contribute to the intervention.                                                                                                               | Irons    |
|                                                                                                                 |                                                                                                                                                                                                                                                                                                       |                                                                                                                      | Mindfulness: mindfulness intervention is acceptable                                | Total of 31 FCs were included in the trial, overall, findings confirmed the feasibility and acceptability of the intervention for FCs, and the interviews, revealed that the intervention was associated with several participant-identified benefits and no severe adverse effects. | Aldaken  |
| <b>Implementation outcomes:</b> the effects of deliberate and purposive actions to implement the interventions. | <b>Feasibility:</b> the extent to which a new intervention can be successfully used or carried out within a given setting. Typically invoked retrospectively as a potential explanation of an intervention's success or failure, as reflected in poor recruitment, retention, or participation rates. | <b>Recruitment:</b> factors related to raising awareness about an intervention and recruiting suitable participants. | Case management: lack of clarity on service content                                | Carers' lack of clarity about the Admiral Nurse role was also observed; 'never really found out what the Admiral Nurse service was offering'.                                                                                                                                        | Bunn     |
|                                                                                                                 |                                                                                                                                                                                                                                                                                                       |                                                                                                                      | Psychoeducation: recruitment issues in tech interventions                          | In a small number of studies, despite extensive recruitment efforts and provision of equipment and technical support, recruitment and completion rates still struggled.                                                                                                              | Sin      |
|                                                                                                                 |                                                                                                                                                                                                                                                                                                       |                                                                                                                      | Respite: advice to use comes from primary care                                     | The most accessible location for advice is the primary health-care centre.                                                                                                                                                                                                           | Shaw     |
|                                                                                                                 |                                                                                                                                                                                                                                                                                                       |                                                                                                                      | Respite: lack of information on available services                                 | Not only was there evidence of limited access to respite services but also there was a low awareness of the availability of services.                                                                                                                                                | Shaw     |
|                                                                                                                 |                                                                                                                                                                                                                                                                                                       |                                                                                                                      | Respite: GPs not effective providing support despite being most accessible         | The most accessible location for advice is the primary health-care centre, but it was suggested by more than one study that GPs do not appear to be providing appropriate support and information.                                                                                   | Shaw     |
|                                                                                                                 |                                                                                                                                                                                                                                                                                                       |                                                                                                                      | Respite: awareness on services low in minorities                                   | Not only was there evidence of limited access to respite services but also there was a low awareness of the availability of services.                                                                                                                                                | Shaw     |
|                                                                                                                 |                                                                                                                                                                                                                                                                                                       |                                                                                                                      | Respite: medical staff not informed about services                                 | Medical practitioners were identified as having limited knowledge of community support services and access to information resulting in poor referral processes and therefore, poor utilization by family carers and people living with dementia.                                     | Du Preez |

|                                                                                                                 |                                                                                                                                                                                                                                                                                                       |                                                                                                                              |                                                                           |                                                                                                                                                                                                                                |          |
|-----------------------------------------------------------------------------------------------------------------|-------------------------------------------------------------------------------------------------------------------------------------------------------------------------------------------------------------------------------------------------------------------------------------------------------|------------------------------------------------------------------------------------------------------------------------------|---------------------------------------------------------------------------|--------------------------------------------------------------------------------------------------------------------------------------------------------------------------------------------------------------------------------|----------|
| <b>Implementation outcomes:</b> the effects of deliberate and purposive actions to implement the interventions. | <b>Feasibility:</b> the extent to which a new intervention can be successfully used or carried out within a given setting. Typically invoked retrospectively as a potential explanation of an intervention's success or failure, as reflected in poor recruitment, retention, or participation rates. | <b>Accessibility:</b> physical, time-related or other external factors that limit or facilitate access to the interventions. | Case management: limiting admissions to confirmed dementia cases only     | The failure factors were: [...] and not including patients without a confirmed diagnosis of dementia.                                                                                                                          | Goeman   |
|                                                                                                                 |                                                                                                                                                                                                                                                                                                       |                                                                                                                              | Psychoeducation: access and time may be of concern for tech interventions | A few studies reported difficulties in even recruiting and retaining carers due to obstacles of access, cost, and time regarding use of technology.                                                                            | Sin      |
|                                                                                                                 |                                                                                                                                                                                                                                                                                                       |                                                                                                                              | Counselling: telephone counselling is accessible                          | Carers find the telephone a good tool for receiving counselling as it helps avoid the stress involved in co-ordinating an appointment.                                                                                         | Lins     |
|                                                                                                                 |                                                                                                                                                                                                                                                                                                       |                                                                                                                              | Respite: transport may be an issue                                        | There were a number of reports of complaints concerning transport, which included lack of transport in rural areas and a general unreliability of transport services.                                                          | Shaw     |
|                                                                                                                 |                                                                                                                                                                                                                                                                                                       |                                                                                                                              | Respite: waiting lists problematic                                        | Waiting lists proved to be an issue for nursing home care and night care.                                                                                                                                                      | Shaw     |
|                                                                                                                 |                                                                                                                                                                                                                                                                                                       |                                                                                                                              | Respite: transport may be an issue                                        | Transport was reported to be a significant barrier to utilization for carers. Use of public transport to access adult day service as opposed to transport being provided was found to be difficult and time-consuming.         | Du Preez |
|                                                                                                                 |                                                                                                                                                                                                                                                                                                       |                                                                                                                              | Creative arts: dyadic art interventions are accessible                    | As the group was for both partners of the dyad and reported to be accessible, this may have had a positive influence on relationships and communication, facilitating a sense of reciprocity.                                  | Bourne   |
|                                                                                                                 |                                                                                                                                                                                                                                                                                                       |                                                                                                                              | Creative arts: singing is accessible for all                              | Caregivers highlighted other parts of the singing group experience to be important. These included the accessibility of singing for all.                                                                                       | Bourne   |
| <b>Implementation outcomes:</b> the effects of deliberate and purposive actions to implement the interventions. | <b>Feasibility:</b> the extent to which a new intervention can be successfully used or carried out within a given setting. Typically invoked retrospectively as a potential explanation of an intervention's success or failure, as reflected in poor recruitment, retention, or participation rates. | <b>Service availability:</b> factors related to coverage of services in terms of offered times and availability of staff.    | Creative arts: art-viewing is accessible                                  | Reported benefits included new learning, stimulation, and the accessibility of the activities, which creates a sense of normalcy and altered perceptions about PWD's abilities.                                                | Bourne   |
|                                                                                                                 |                                                                                                                                                                                                                                                                                                       |                                                                                                                              | Case management: access easy, but contact difficult outside working hours | There was evidence that making and maintaining contact with the service initially was found to be easy in the majority of cases, but only just over half of the respondents knew who to contact outside Admiral Nurse's hours. | Bunn     |
|                                                                                                                 |                                                                                                                                                                                                                                                                                                       |                                                                                                                              | Counselling: 24/7 service is a must                                       | Carers agreed that 24-hour availability of telephone counselling is necessary.                                                                                                                                                 | Lins     |
|                                                                                                                 |                                                                                                                                                                                                                                                                                                       |                                                                                                                              | Counselling: answering machines insufficient                              | Existing arrangements, such as answering machines for the times when counselling is not available, were not sufficient.                                                                                                        | Lins     |
|                                                                                                                 |                                                                                                                                                                                                                                                                                                       |                                                                                                                              | Counselling: telephone counselling is flexible                            | It is a very comfortable means of counselling because carers do not have to leave their homes and its flexibility allows sessions to be fitted into their daily nursing routines.                                              | Lins     |

|                                                                                                          |                                                                                                                                                                                                                                                                                                |                                                                                                 |                                                                        |                                                                                                                                                                                                                                                                |             |
|----------------------------------------------------------------------------------------------------------|------------------------------------------------------------------------------------------------------------------------------------------------------------------------------------------------------------------------------------------------------------------------------------------------|-------------------------------------------------------------------------------------------------|------------------------------------------------------------------------|----------------------------------------------------------------------------------------------------------------------------------------------------------------------------------------------------------------------------------------------------------------|-------------|
|                                                                                                          |                                                                                                                                                                                                                                                                                                |                                                                                                 | Respite: flexibility of day care is key                                | flexibility of the DC in relation to available days and times, and the possibility of a regular or intermittent frequency.                                                                                                                                     | Maffioletti |
|                                                                                                          |                                                                                                                                                                                                                                                                                                |                                                                                                 | Respite: timing and flexibility can be problematic                     | A major barrier to the uptake of respite services was a lack of response to carer needs in terms of timing and flexibility of service provision.                                                                                                               | Shaw        |
|                                                                                                          |                                                                                                                                                                                                                                                                                                |                                                                                                 | Respite: working carers not accommodated schedule-wise                 | In another study day care was only offered for 3 days a week and finished at 3pm, which did not accommodate the needs of working carers.                                                                                                                       | Shaw        |
|                                                                                                          |                                                                                                                                                                                                                                                                                                |                                                                                                 | Respite: weekends and evenings not covered                             | Problems with day care were the lack of weekend and evening provision.                                                                                                                                                                                         | Shaw        |
|                                                                                                          |                                                                                                                                                                                                                                                                                                |                                                                                                 | Creative arts: different preferences on length of intervention         | Some participants shared disappointment that the intervention was time-limited, whilst others said that it would be difficult to continue the sessions long-term due to care-giving responsibilities.                                                          | Bourne      |
|                                                                                                          |                                                                                                                                                                                                                                                                                                |                                                                                                 | Mindfulness: carers appreciate informality and availability of service | Chronic conditions: Qualitative results indicated that the informal practice was particularly helpful and could be used at any time.                                                                                                                           | Li          |
|                                                                                                          |                                                                                                                                                                                                                                                                                                |                                                                                                 | Mindfulness: dyadic mindfulness is more practical to attend            | Also, it might be more feasible for caregivers because they would not have to leave care recipients alone.                                                                                                                                                     | Li          |
| Implementation outcomes: the effects of deliberate and purposive actions to implement the interventions. | Feasibility: the extent to which a new intervention can be successfully used or carried out within a given setting. Typically invoked retrospectively as a potential explanation of an intervention's success or failure, as reflected in poor recruitment, retention, or participation rates. | Adoption and retention: factors related to continued use of services or drop-out from services. | Psychoeducation: technical issues may arise                            | Usability problems (such as oral communication/chat quality, audio-visual function failure) were also identified as attributing to high drop-out rates (up to 50%) in some studies.                                                                            | Sin         |
|                                                                                                          |                                                                                                                                                                                                                                                                                                |                                                                                                 | Psychoeducation: older spousal carers find technology challenging      | Most studies included focused on carers of dementia patients, and this was also the area with the most frequently reported problems in access and usability, as encountered by a group of largely elderly spousal carers who were often not familiar with ICT. | Sin         |
|                                                                                                          |                                                                                                                                                                                                                                                                                                |                                                                                                 | Psychoeducation: dropout due to severe patients and carer time         | Reasons for participant withdrawal included ill health of the person cared for and carer constraints.                                                                                                                                                          | Smith       |
|                                                                                                          |                                                                                                                                                                                                                                                                                                |                                                                                                 | Psychoeducation: older adults find technology challenging              | There appears to still be a gap between those who use or can use the internet and those who don't, with a study in 2015 highlighting that almost all adults over 70 years of age had difficulty using the intervention.                                        | Hopwood     |
|                                                                                                          |                                                                                                                                                                                                                                                                                                |                                                                                                 | Respite: carers need to prepare patients for respite                   | Carers reported having difficulty assisting their care recipient with their activities of daily living in preparation for the day's attendance.                                                                                                                | Du Preez    |

|                                                                                                                 |                                                                                                                                                                             |                                                                                                                    |                                                                            |                                                                                                                                                                                                                                                                                                                                                                                 |          |
|-----------------------------------------------------------------------------------------------------------------|-----------------------------------------------------------------------------------------------------------------------------------------------------------------------------|--------------------------------------------------------------------------------------------------------------------|----------------------------------------------------------------------------|---------------------------------------------------------------------------------------------------------------------------------------------------------------------------------------------------------------------------------------------------------------------------------------------------------------------------------------------------------------------------------|----------|
| <b>Implementation outcomes:</b> the effects of deliberate and purposive actions to implement the interventions. | <b>Feasibility:</b> the extent to which a new intervention can be successfully used or carried out within a given setting. Typically invoked retrospectively as a potential | <b>Systemic factors:</b> Larger structural factors related to the organization of health and social care services. | Respite: multicomponent interventions increase utilization                 | Adult day services that offer comprehensive services that engage dementia caregivers by way of phone calls or one-on-one carer meetings to address their areas of concern, invite carer collaboration in planning meetings, provide carer education, counseling and case management were seen to facilitate increased service utilization and delay early institutionalization. | Du Preez |
|                                                                                                                 |                                                                                                                                                                             |                                                                                                                    | Respite: severe patients difficult to prepare and reluctant to participate | Carers reported having difficulty assisting their care recipient with their activities of daily living in preparation for the day's attendance. This was exacerbated by their care recipient's co-morbidities and resistance to attendance.                                                                                                                                     | Du Preez |
|                                                                                                                 |                                                                                                                                                                             |                                                                                                                    | Respite: decline in function leads to exclusion from service               | Another barrier to use is attendance being conditional upon attendees being able to independently self-care.                                                                                                                                                                                                                                                                    | Du Preez |
|                                                                                                                 |                                                                                                                                                                             |                                                                                                                    | Respite: person centered activities increase utilization                   | Adult day services' ability or inability to offer a variety of activities that were person-centered and held meaning for attendees was a motivating factor for use.                                                                                                                                                                                                             | Du Preez |
|                                                                                                                 |                                                                                                                                                                             |                                                                                                                    | Respite: services minimizing stigma leads to greater utilization           | Whilst separation may lead to stigmatization, group inclusion for attendees with cognitive decline appeared to promote their disengagement from activities requiring cognitive demand. However, Gaugler found staff overcame these issues through validation and one-to-one interaction.                                                                                        | Du Preez |
|                                                                                                                 |                                                                                                                                                                             |                                                                                                                    | Respite: timing and flexibility may be barriers                            | A major barrier to the uptake of respite services was a lack of response to carer needs in terms of timing and flexibility of service provision.                                                                                                                                                                                                                                | Shaw     |
|                                                                                                                 |                                                                                                                                                                             |                                                                                                                    | Respite: severe PwD excluded                                               | With confusion comes inappropriate behaviours, which were difficult for both in-home and institutional respite carers to accommodate, resulting in exclusion of the care recipient from the service.                                                                                                                                                                            | Shaw     |
|                                                                                                                 |                                                                                                                                                                             |                                                                                                                    | Respite: service is used for maintaining nutrition                         | As the care recipient's condition deteriorates carers express concern for safety and the need for a sitter may be expressed. There are also concerns about maintaining care recipient health in relation to maintaining adequate nutrition.                                                                                                                                     | Shaw     |
|                                                                                                                 |                                                                                                                                                                             |                                                                                                                    | Respite: progression of disease triggers use of service                    | As the care recipient's condition deteriorates carers express concern for safety and the need for a sitter may be expressed.                                                                                                                                                                                                                                                    | Shaw     |
|                                                                                                                 |                                                                                                                                                                             |                                                                                                                    | Case management: primary care not involved is hindering                    | The failure factors were: [...] little or no involvement of primary care specialists.                                                                                                                                                                                                                                                                                           | Goeman   |
|                                                                                                                 |                                                                                                                                                                             |                                                                                                                    | Case management: competition to deliver care is a barrier                  | The failure factors were: [...] competition for delivering care.                                                                                                                                                                                                                                                                                                                | Goeman   |

|                                                                                                                                  |                                                                                                                                                                                                                                                                                                       |                                                                 |                                                                             |                                                                                                                                                                                                                                                                                                                                                                                                                                                                                                                                                                                                                                                                                                                                                                                         |           |
|----------------------------------------------------------------------------------------------------------------------------------|-------------------------------------------------------------------------------------------------------------------------------------------------------------------------------------------------------------------------------------------------------------------------------------------------------|-----------------------------------------------------------------|-----------------------------------------------------------------------------|-----------------------------------------------------------------------------------------------------------------------------------------------------------------------------------------------------------------------------------------------------------------------------------------------------------------------------------------------------------------------------------------------------------------------------------------------------------------------------------------------------------------------------------------------------------------------------------------------------------------------------------------------------------------------------------------------------------------------------------------------------------------------------------------|-----------|
| <p>explanation of an intervention's success or failure, as reflected in poor recruitment, retention, or participation rates.</p> |                                                                                                                                                                                                                                                                                                       |                                                                 | Case management: medical staff not collaborating with admiral nurses        | At times, carers felt that GPs, specialists and care managers did not work with or communicate with Admiral Nurses; 'Care manager doesn't seem to communicate with Admiral Nurse'.                                                                                                                                                                                                                                                                                                                                                                                                                                                                                                                                                                                                      | Bunn      |
|                                                                                                                                  |                                                                                                                                                                                                                                                                                                       |                                                                 | Education/skills: carers appreciate having one source of information        | Caregivers emphasised the importance of having one central source for information, for example a key worker to liaise with during visits.                                                                                                                                                                                                                                                                                                                                                                                                                                                                                                                                                                                                                                               | Pritchard |
|                                                                                                                                  |                                                                                                                                                                                                                                                                                                       |                                                                 | Respite: systems do not respond to need                                     | Additionally, imperatives of service delivery systems place carers in a vulnerable position seemingly prioritizing these systems above the needs of caregivers. Utilization of services is often determined by effective referral by health professionals.                                                                                                                                                                                                                                                                                                                                                                                                                                                                                                                              | Du Preez  |
|                                                                                                                                  |                                                                                                                                                                                                                                                                                                       |                                                                 | Respite: bureaucracy unavoidable and intruding upon care receiver's privacy | Furthermore, interaction with adult day service providers requires carers to adopt institutional processes and intrudes upon their care recipient's privacy, albeit it to promote that person's quality of life.                                                                                                                                                                                                                                                                                                                                                                                                                                                                                                                                                                        | Du Preez  |
| <b>Implementation outcomes:</b> the effects of deliberate and purposive actions to implement the interventions.                  | <b>Feasibility:</b> the extent to which a new intervention can be successfully used or carried out within a given setting. Typically invoked retrospectively as a potential explanation of an intervention's success or failure, as reflected in poor recruitment, retention, or participation rates. | <b>Other:</b> other determinants of feasibility, not groupable. | Mindfulness: mindfulness intervention is feasible                           | Total of 31 FCs were included in the trial, overall, findings confirmed the feasibility and acceptability of the intervention for FCs, and the interviews, revealed that the intervention was associated with several participant-identified benefits and no severe adverse effects.                                                                                                                                                                                                                                                                                                                                                                                                                                                                                                    | Aldaken   |
| <b>Implementation outcomes:</b> the effects of deliberate and purposive actions to implement the interventions.                  | <b>Appropriateness:</b> perceived suitability and usefulness of intervention to address needs of caregivers.                                                                                                                                                                                          | <b>N.A.</b>                                                     | Case management: some needs are overlooked                                  | Case management offered potential benefit to people with dementia, their carers and community-based professionals through continuity of care by a named trusted individual that could act proactively to prevent a crisis. However, it was also shown that needs may be overlooked.                                                                                                                                                                                                                                                                                                                                                                                                                                                                                                     | Goeman    |
|                                                                                                                                  |                                                                                                                                                                                                                                                                                                       |                                                                 | Case management: multidisciplinary and continued services meet more needs   | The specialist multi-agency home support service demonstrated greater flexibility and responsiveness to the particular needs and circumstances of service users and family carers, who were encouraged to participate in routine decision-making and activities. By sharing responsibilities, the specialist service helped reduce carer stress and prevent crises. These outcomes depended on the configuration of the service, including multidisciplinary health and social services input, care worker autonomy and independence, continuous reassessment of clients' circumstances and preferences and the capacity to develop long-term relationships, through care worker continuity. The standard service, which used a task orientated approach, lacked these characteristics. | Goeman    |

|                                                                                                                     |                                                                                                                                                                                                                                                                                                                                                                                                     |           |
|---------------------------------------------------------------------------------------------------------------------|-----------------------------------------------------------------------------------------------------------------------------------------------------------------------------------------------------------------------------------------------------------------------------------------------------------------------------------------------------------------------------------------------------|-----------|
| Case management: integration of care is necessary                                                                   | It was found that the success for case management in long-term dementia care concern the expert knowledge of case managers; investment in a strong provider network and coherent conditions for effective inter-organisational cooperation to deliver integrated care.                                                                                                                              | Goeman    |
| Case management: patient-centeredness is appropriate                                                                | It is suggested that the appropriate way of offering case management is through a patient-centred approach.                                                                                                                                                                                                                                                                                         | Goeman    |
| Case management: admiral nurse as a liaison among care providers                                                    | A commonly reported component of the Admiral Nurse role was facilitation, which included liaison with other health and social care services; 'She makes sure she liaises with all the agencies concerned with mum's care'.                                                                                                                                                                          | Bunn      |
| Psychoeducation: Internet based support not for all                                                                 | Qualitative evaluations of the interventions demonstrated positive views from most caregivers toward internet-based support interventions, although it is clear that not all would benefit from such interventions.                                                                                                                                                                                 | Hopwood   |
| Psychoeducation: carers don't appreciate general information                                                        | [...] with caregivers expressing frustration when required to review information that did not meet their specific needs.                                                                                                                                                                                                                                                                            | Hopwood   |
| Psychoeducation: interaction with professionals more beneficial than just information                               | However, other multiple-component interventions evaluated with qualitative methods found that caregivers found other components, such as interaction with professionals, more beneficial than information.                                                                                                                                                                                          | Hopwood   |
| Education/skills: Face-to-face and repeated information preferred                                                   | Appropriate modality and timing of information means the person may require information to be presented in different ways (e.g., in writing, diagrams) repeated on several occasions and in person, not over the phone.                                                                                                                                                                             | Pritchard |
| Education/skills: differences between carers should be considered                                                   | The interaction between the personal characteristics of both the patient and caregiver is not always considered by health professionals. However, because the skills of the caregiver can impact the patient and vice versa, considering the interaction is paramount. Personal characteristics is also influenced by and influences organisational culture and the level of information provision. | Pritchard |
| Education/skills: carers' needs addressed related to information, coping mechanisms, assessment of home environment | The interventions addressed the need for clear information about the disease, identification of psychological response, development of coping mechanisms and assessment of the home environment.                                                                                                                                                                                                    | Pritchard |
| Counselling: counsellors inform carers about other suitable services                                                | Together with the carers, counsellors identify the most suitable services, which helps the carers to understand that they have access to an extensive help system in addition to telephone counselling.                                                                                                                                                                                             | Lins      |

|                                                                                                                 |                                                                                              |             |                                                                             |                                                                                                                                                                                                                                                   |           |
|-----------------------------------------------------------------------------------------------------------------|----------------------------------------------------------------------------------------------|-------------|-----------------------------------------------------------------------------|---------------------------------------------------------------------------------------------------------------------------------------------------------------------------------------------------------------------------------------------------|-----------|
|                                                                                                                 |                                                                                              |             | Counselling: more severe cases need more counselling                        | Counselling for carers is most needed, for example, in the case of an accident or during the final phase of the disease.                                                                                                                          | Lins      |
|                                                                                                                 |                                                                                              |             | Counselling: service needed to face potentially escalating crises           | Carers need assistance most acutely in difficult situations when they feel insecure and see that an escalation is possible.                                                                                                                       | Lins      |
|                                                                                                                 |                                                                                              |             | Respite: respite seen as more appropriate for severe patients               | Carers of recipients with dementia felt that day care, for example, was more appropriate for more severely demented people who were unaware of their surroundings.                                                                                | Shaw      |
|                                                                                                                 |                                                                                              |             | Creative arts: group art not always beneficial                              | Two studies reported neutral or negative comments regarding participation in the group. These included some caregivers reporting initial apprehensiveness about attending, no effect on themselves but effects on the PWD.                        | Bourne    |
|                                                                                                                 |                                                                                              |             | Creative arts: carers cannot relax due to worry about PwD                   | These included some caregivers reporting initial apprehensiveness about attending, no effect on themselves but effects on the PWD, and difficulties with relaxation due to concerns about the PWD.                                                | Bourne    |
|                                                                                                                 |                                                                                              |             | Creative arts: song writing addresses needs not met by other groups         | The song writing group filled a gap for caregivers that were not met by other support groups.                                                                                                                                                     | Irons     |
|                                                                                                                 |                                                                                              |             | Creative arts: members of dyads don't have same needs                       | It may have been difficult to structure and time the delivery of an intervention to appeal to both caregiver and care-recipient, as illustrated by this quote: "I think it drew him out more than it drew me out. And why that is, I don't know." | Irons     |
|                                                                                                                 |                                                                                              |             | Mindfulness: not all relaxing or benefitting                                | Although, these potential benefits were not universal, and some participants did report difficulty fully relaxing during the process.                                                                                                             | Parkinson |
| <b>Implementation outcomes:</b> the effects of deliberate and purposive actions to implement the interventions. | <b>Sustainability:</b> factors associated with sustained, long-term use of the intervention. | <b>N.A.</b> | Psychoeducation: shared experiences in peer support leads to sustainability | Carers were more likely to have successful peer support relationships and to continue meeting after the intervention ended, if they were similar on the shared experience of caring.                                                              | Smith     |
|                                                                                                                 |                                                                                              |             | Respite: experience of benefit and opportunistic use leads to regular use   | The need for respite for particular social events or occasions such as conferences, weddings and holidays triggered the use of respite, and once the benefit was experienced and proved successful it was used again on a more regular basis.     | Shaw      |
|                                                                                                                 |                                                                                              |             | Mindfulness: mindfulness interventions sustained by carers                  | Qualitatively, participants reported the continued use of mindful based exercise and personal benefits of fostered compassion and forgiveness from the program.                                                                                   | Li        |
|                                                                                                                 |                                                                                              |             | Case management: funding is an issue                                        | The failure factors were: [...] inadequate or no structural funding.                                                                                                                                                                              | Goeman    |

|  |                                   |                                                                                                                                                                                                                                                                       |          |
|--|-----------------------------------|-----------------------------------------------------------------------------------------------------------------------------------------------------------------------------------------------------------------------------------------------------------------------|----------|
|  | Psychoeducation: cost is an issue | A few studies reported difficulties in even recruiting and retaining carers due to obstacles of access, cost, and time regarding use of technology.                                                                                                                   | Sin      |
|  | Respite: cost is an issue         | Because of the different organizational processes involved in the different countries, cost issues may vary.                                                                                                                                                          | Shaw     |
|  | Respite: cost is an issue         | Factors such as concern for privacy violation and cost of service provision diminishes use of services by carers. [...] Affordability is an issue for some carers who constantly weigh their care recipients needs against the economic burden of meeting those need. | Du Preez |

Abbreviations: QoL, Quality of Life; MBIs, Mindfulness-Based Interventions; LTCs, Long Term Conditions; PwD, Person with Dementia; MBSR, Mindfulness-Based Stress Reduction; PCIS, Patient and Carer Information and Support; CALD, Culturally And Linguistically Diverse; FC, Family Caregiver; DC, Day Care; ICT, Information and Communication Technology
